# Supplementary material for: Identifying longevity associated genes by integrating gene expression and curated annotations
Source: PLoS Comput Biol. 2020 Nov 30;16(11):e1008429. doi: 10.1371/journal.pcbi.1008429 (PMC7728194; doi:10.1371/journal.pcbi.1008429)
Supplement: S1 Data — (XLSX) [file pcbi.1008429.s012.xlsx]

## Sheet: notes
All results shown are for C. elegans
glmnet classifier model was trained using genage annotations (pro or anti longevity) as the outcome with ARCHS4 gene expression and GO terms as predictors
pro-longevity means the organism's lifespan decreases when the gene is knocked out.
anti-longevity (pro-aging) means the organism's lifespan increases when the gene is knocked out.

## Sheet: pro-longevity-genage
gene	predicted prob of pro-longevity
NCBP-2	0.873121
CEH-20	0.780229
HSP-16.48	0.768864
HSP-16.49	0.768864
AIN-1	0.76263
SNAP-29	0.747165
MNK-1	0.743346
LPR-5	0.736459
HSP-16.1	0.734517
RPN-6.1	0.732477
TBP-1	0.722708
HSP-4	0.720322
BUS-8	0.720256
ARL-8	0.709268
DPY-27	0.707041
AIP-1	0.706354
MAG-1	0.703489
C26B9.3	0.699939
DAF-18	0.697996
F35D2.3	0.697552
MDT-26	0.693641
RPT-1	0.687482
MEP-1	0.680508
PHA-4	0.676477
UBC-13	0.671192
UNC-62	0.671111
RAB-7	0.663068
ATG-4.2	0.658312
BET-1	0.655363
C01F1.1	0.654938
RAB-5	0.653658
SIR-2.1	0.652743
DIN-1	0.650141
HPK-1	0.647708
APY-1	0.642274
ADR-2	0.63301
BLMP-1	0.632332
PAB-2	0.632228
PBS-5	0.6316
NHR-25	0.630782
MML-1	0.63076
NUMR-1	0.62803
NUMR-2	0.62803
TLF-1	0.626318
DVE-1	0.624803
MET-2	0.624169
ACN-1	0.624081
CST-1	0.623832
FTT-2	0.622483
WWP-1	0.62122
HLH-30	0.619027
AAKG-2	0.618363
MDL-1	0.61519
USP-48	0.615032
HSF-1	0.613025
EGL-18	0.612499
ARX-4	0.60854
CIT-1.2	0.605078
AAKB-1	0.604687
NFI-1	0.603132
CTH-1	0.600991
SKN-1	0.599328
LET-653	0.599131
ATG-4.1	0.598735
PRDX-3	0.598274
LIN-15B	0.597281
EGL-27	0.596596
ATG-5	0.595498
BRA-1	0.595094
ATG-3	0.589986
VPS-22	0.589921
GLF-1	0.587112
DRR-1	0.586051
AGMO-1	0.584915
GDI-1	0.583996
NPP-3	0.583814
CUL-1	0.582291
SMN-1	0.58154
VPS-20	0.57914
NHR-49	0.579077
ZFP-1	0.577576
RSR-2	0.577067
LIN-40	0.576754
TCER-1	0.574193
ULP-1	0.573108
CALU-1	0.570095
SMK-1	0.569959
MXL-2	0.566817
CEH-10	0.565412
DAF-5	0.565317
ELT-6	0.563455
DAF-16	0.561993
PAT-3	0.558829
LBP-4	0.55863
SNAP-1	0.558413
VRK-1	0.556756
LIN-11	0.555816
LSM-7	0.553049
EGL-30	0.552758
SYD-2	0.552056
RPN-11	0.551645
CEL-1	0.551386
IRE-1	0.550664
GEI-4	0.549499
CCR-4	0.548612
APL-1	0.548513
MDT-15	0.547832
MTM-3	0.547497
EGL-9	0.54713
LET-502	0.54669
SPTF-3	0.546508
F33H2.8	0.546135
DIS-3	0.544707
AAKB-2	0.541153
CEH-37	0.538887
F37C4.4	0.536527
ACS-20	0.536231
ATG-9	0.53599
DNJ-21	0.535745
SET-6	0.53257
SHC-1	0.532011
AAK-2	0.530689
BEC-1	0.530635
SET-2	0.530021
SPR-3	0.529325
RAB-10	0.528825
ATX-3	0.528056
AHA-1	0.526933
ACS-7	0.526713
ERI-1	0.517022
UNC-60	0.515689
SKR-1	0.514613
PHB-2	0.512307
DAF-3	0.511205
VPS-37	0.511129
NSTP-3	0.509346
VAB-1	0.508898
UFD-1	0.508072
MVK-1	0.507953
PCF-11	0.506509
SBDS-1	0.506168
LEM-2	0.502935
DAF-14	0.502848
ADR-1	0.502002
WDR-23	0.501287

## Sheet: pro-longevity-non-genage
gene	predicted prob of pro-longevity
CLEC-196	0.867893
F44E5.4	0.86639
CEH-13	0.859298
LPR-3	0.8532
HIL-7	0.845044
W04A8.4	0.835627
TTH-1	0.815968
GST-1	0.814339
F44E5.5	0.81225
F20C5.6	0.80699
SYM-1	0.805783
SQT-3	0.794907
NOAH-1	0.789825
C14F11.6	0.788183
DPY-14	0.786502
SWAN-2	0.783042
EPN-1	0.782534
FKB-7	0.777102
HIS-18	0.777017
D1007.4	0.774931
CEH-27	0.773766
HIS-66	0.772935
SQST-1	0.772684
F11G11.5	0.770696
K03H1.13	0.766196
BCL-7	0.765078
HIL-3	0.763181
HBL-1	0.75483
SUP-26	0.754573
FLH-2	0.754445
ATF-8	0.752624
CEBP-2	0.752142
EAF-1	0.751737
WRT-1	0.75141
DNC-2	0.750867
F13E9.11	0.750841
CEC-1	0.750577
COPZ-1	0.749335
LPR-6	0.74916
TBX-2	0.749156
BLOS-2	0.746634
HCP-3	0.745275
HIS-24	0.745001
SYD-9	0.741646
CEH-38	0.740814
F21C10.10	0.738773
KBP-2	0.738112
AGT-2	0.737298
LPR-4	0.737085
LET-4	0.735816
ABU-14	0.734087
ICL-1	0.732852
DLG-1	0.732605
ATF-2	0.731514
HMBX-1	0.730075
CEH-34	0.729061
HIS-17	0.728743
NHR-17	0.728384
TAG-196	0.727738
HSP-16.2	0.726878
PAN-1	0.726183
DPY-7	0.724361
CKI-1	0.724113
C02F5.12	0.720214
C05A9.2	0.719202
TAG-353	0.718255
ZYG-12	0.717689
HRPK-1	0.717438
NOAH-2	0.716766
CND-1	0.715642
UBH-2	0.715125
KIN-20	0.714898
LIT-1	0.71378
Y65B4BL.7	0.712524
TLP-1	0.711888
AQP-2	0.706749
PLIN-1	0.706652
EEED8.2	0.70654
WRM-1	0.705954
APS-2	0.705464
CUT-2	0.70542
T23G11.7	0.705389
MOM-5	0.703742
ZK484.4	0.702443
SKR-21	0.702337
UNC-84	0.701855
RNP-1	0.70174
CEH-43	0.700934
F18C5.10	0.700046
REPO-1	0.697777
ATF-7	0.697444
HAM-1	0.697311
C45G9.7	0.69718
F53B1.4	0.696795
C01G6.4	0.696743
K04H4.2	0.695107
F41E6.5	0.694703
VPS-60	0.693413
HSP-16.41	0.69326
RAB-14	0.692938
K08B12.1	0.692767
MBK-2	0.692363
CYN-6	0.690956
F08G2.5	0.690745
F36H5.17	0.690171
C08F1.10	0.68833
C09E7.4	0.687099
DMD-6	0.687052
HLH-2	0.686628
HIS-5	0.686271
TAF-13	0.685734
F40E10.6	0.684213
PSF-2	0.684147
CUT-3	0.68341
R02D5.1	0.682798
HIS-7	0.682461
COPB-2	0.682408
PBRM-1	0.682354
DPY-2	0.682317
ALG-1	0.681778
SOX-2	0.681299
TBX-11	0.680801
UNC-116	0.679107
T19H5.4	0.678882
SAR-1	0.678488
F25H2.4	0.678391
CNI-1	0.678029
LHFP-4	0.676005
LIN-66	0.675985
UBC-6	0.675769
SOP-2	0.675612
ENT-2	0.675611
W02F12.4	0.675123
W05H9.1	0.674836
COL-165	0.674779
ADA-2	0.674754
TIR-1	0.674237
MADF-10	0.674158
COL-74	0.674119
SZY-20	0.671633
C56G2.15	0.671482
C50D2.5	0.670899
T23F11.4	0.669596
LGG-2	0.66895
SYM-2	0.668624
ASNS-2	0.668321
SURO-1	0.667806
B0334.5	0.667755
RBR-2	0.666974
GKOW-1	0.666933
CWN-2	0.665573
VPS-29	0.664861
MLT-11	0.664729
C18E9.2	0.664604
C06E1.1	0.66431
DHS-22	0.663614
T07F8.4	0.663209
HIS-25	0.663184
HIL-2	0.662572
CCF-1	0.661875
TAF-9	0.661588
GFL-1	0.661539
HIM-1	0.66129
SEDL-1	0.66112
NCK-1	0.661066
C07A12.7	0.661015
PTR-4	0.660219
RAN-5	0.659856
DSL-3	0.659582
SUCO-1	0.659537
CDT-1	0.659491
PQN-21	0.659314
DPY-10	0.658576
MYRF-2	0.658274
DMA-1	0.658207
MEC-8	0.656685
ZK637.14	0.656652
ZTF-29	0.656607
F11C1.7	0.656476
Y39B6A.3	0.65636
OGT-1	0.655516
RBBP-5	0.655481
MYS-1	0.655373
CDK-5	0.655238
UNC-69	0.655155
EDC-3	0.654902
HLH-14	0.654248
TTR-53	0.654211
CHT-1	0.653936
PAT-9	0.653817
IMP-2	0.653643
MXL-1	0.653551
RPN-9	0.653402
ZK1053.4	0.653244
EFL-3	0.653138
ZTF-11	0.65237
MYRF-1	0.652153
HASP-1	0.652094
MUTD-1	0.652034
VHP-1	0.652007
CEH-32	0.651867
UBA-1	0.651857
ZIP-7	0.651821
UBQL-1	0.651196
F37A4.2	0.65119
FZR-1	0.651002
R05G6.4	0.650821
CCDC-55	0.650484
EAT-16	0.650337
LET-607	0.649979
GFI-2	0.649814
LET-92	0.649512
HIS-41	0.649506
CFIM-1	0.649472
DHFR-1	0.649377
LIN-32	0.64896
MAB-7	0.648527
CDC-14	0.648502
LIN-37	0.647832
T28H10.3	0.647121
PFN-1	0.646682
R12C12.6	0.646668
C33F10.14	0.646658
F13C5.2	0.645991
MEX-3	0.645652
SEL-12	0.645254
CHD-3	0.645206
RAB-11.1	0.644913
DPY-3	0.644012
M106.8	0.643796
D1014.5	0.643419
CACN-1	0.643337
F44E2.4	0.642999
FBN-1	0.642952
FKB-3	0.642786
STIP-1	0.642744
C24H12.1	0.642685
ATGP-2	0.64248
K08B4.2	0.642133
NHR-44	0.641773
POP-1	0.641417
CRN-2	0.64129
HMG-5	0.641252
HIS-11	0.641175
BLOS-4	0.640878
UBC-20	0.640694
IMA-3	0.640628
R08D7.7	0.640296
FIC-1	0.63968
HIS-19	0.638688
HIS-21	0.638688
HIS-51	0.638688
HIS-53	0.638688
AOS-1	0.638525
T12G3.4	0.638347
LEO-1	0.63823
T23B3.2	0.638123
JMJD-3.1	0.637794
IGCM-3	0.637757
DPY-17	0.637626
OSM-8	0.637339
R05D11.5	0.637202
NHR-20	0.637073
R90.1	0.636911
RHO-1	0.636846
EPG-7	0.636615
LIN-26	0.636315
MIG-15	0.635434
CKS-1	0.635374
HMP-1	0.635054
MEK-1	0.634953
MRRF-1	0.63445
W03F9.4	0.634302
NMY-1	0.633719
ZC443.3	0.633711
H14A12.3	0.633677
K07B1.7	0.633127
SPP-13	0.633121
SKR-20	0.633099
PIE-1	0.632874
T19A5.1	0.632717
ZTF-16	0.632498
T09B4.5	0.63212
NHR-47	0.631821
SWD-2.2	0.63167
F44F1.6	0.631659
PRAF-3	0.631004
PKN-1	0.630727
LIN-25	0.630422
Y53F4B.3	0.630186
CYN-4	0.629776
CPSF-4	0.629329
K07C11.10	0.629174
R08B4.3	0.629052
C08B6.4	0.628593
Y54G11A.9	0.628456
UEV-1	0.627937
UNC-97	0.627609
Y39E4B.6	0.627607
FASN-1	0.627227
MEL-26	0.627221
CDK-11.1	0.626905
LET-19	0.626898
T24G10.2	0.626705
Y57A10A.23	0.625877
RPB-6	0.625823
NEP-1	0.625809
Y106G6H.8	0.625604
TRAP-1	0.6256
RPN-10	0.625523
PAS-1	0.62457
TMEM-107	0.624534
F43G9.13	0.624349
IRX-1	0.623795
SEM-2	0.623723
ASD-2	0.623514
CEBP-1	0.623162
GPB-1	0.622905
UNC-129	0.622544
SWSN-3	0.622054
HIS-47	0.621459
BAZ-2	0.62144
TTR-20	0.620543
SUP-17	0.62035
F58B3.6	0.620153
HIS-55	0.619624
GLRX-22	0.619302
UNC-130	0.619114
DPFF-1	0.618843
MBD-2	0.618212
Y41D4B.26	0.618153
SMA-1	0.617918
C46F11.6	0.617896
UNC-6	0.617735
LAM-3	0.617353
SNRP-27	0.617285
HSB-1	0.617245
CBP-1	0.617053
SYX-6	0.617017
F14B4.1	0.616988
F49H12.5	0.61621
F10D7.2	0.616124
UNC-39	0.615954
RRF-1	0.615946
LSM-1	0.615721
TAG-335	0.615501
LIG-4	0.615195
T24B8.2	0.615085
RAP-1	0.614937
SNPN-1	0.614554
ZIP-8	0.614238
PQN-74	0.614014
SPK-1	0.613831
C30B5.2	0.613656
Y59E9AL.36	0.613642
DMD-5	0.613487
PAR-6	0.613484
CLPF-1	0.613422
EFHD-1	0.613209
PMK-3	0.612955
AST-1	0.612832
F09E5.7	0.612678
K07A1.10	0.612657
F15H10.8	0.612515
SUP-37	0.612304
HIS-59	0.612039
C34B2.10	0.611988
C33A12.3	0.611928
F30H5.3	0.611657
F01F1.15	0.611023
C03D6.9	0.610916
RAB-18	0.610539
ATG-13	0.610113
CEH-58	0.60988
DHS-29	0.609718
TBCB-1	0.609712
STO-4	0.609294
C41H7.5	0.609291
F31E3.12	0.60902
CEH-44	0.608981
HIS-38	0.608897
PAL-1	0.608796
ZC449.2	0.608736
DRAP-1	0.608694
ZK1127.3	0.608491
EGRH-1	0.608364
T03F6.3	0.608215
KXD-1	0.608138
SID-5	0.607973
2019-06-01	0.607953
F56C9.10	0.607802
NHR-105	0.60766
RSKD-1	0.607482
C08F1.11	0.607361
CEH-86	0.607284
ATG-7	0.607081
LET-381	0.60702
DYRB-1	0.606655
K08F8.7	0.606448
SLI-1	0.606327
T05F1.13	0.606272
PMK-1	0.606267
CEH-5	0.6062
W08E3.2	0.606154
Y54E10BL.3	0.606046
F48E8.2	0.60561
REF-1	0.605355
F18H3.4	0.605219
T10B5.4	0.605196
SPC-1	0.60519
SKPO-2	0.605105
RAD-51	0.60474
NURF-1	0.60453
M110.10	0.604463
DAB-1	0.604364
COL-121	0.604299
SEK-3	0.604227
UNC-50	0.604222
F18C12.3	0.604151
R04F11.3	0.60386
EGL-26	0.603682
F08G12.1	0.603601
C35D10.1	0.603291
Y41E3.8	0.603181
CES-2	0.603046
LIN-35	0.603034
ISTR-1	0.603028
PROS-1	0.60296
C54C6.6	0.602929
NUD-2	0.602742
LPR-1	0.602572
HINF-1	0.602257
PQN-53	0.601957
LET-49	0.601907
F54C9.11	0.601776
HPL-1	0.601635
CLEC-180	0.601357
HSP-1	0.601298
BATH-44	0.601044
PCT-1	0.600966
LIPS-3	0.600321
H03E18.1	0.600039
ATG-16.2	0.599651
LET-526	0.599185
LSY-22	0.599101
F53B3.5	0.598851
PPH-6	0.598775
RPN-2	0.598708
Y43F8B.2	0.598663
T23G5.2	0.598312
PAS-6	0.597984
Y74C10AL.2	0.597872
K10D3.4	0.597842
ATE-1	0.597805
EGL-44	0.597778
SPDL-1	0.597692
C13F10.1	0.597626
LIN-52	0.597554
CEH-74	0.597204
CLSP-1	0.596956
SMC-3	0.596813
DRE-1	0.596767
BED-3	0.596692
F57C9.4	0.596672
K07C11.4	0.596516
MLS-2	0.596242
SAX-1	0.596213
F34D10.3	0.596093
HDA-2	0.595856
COQ-4	0.595826
CPN-2	0.595586
MIF-3	0.59545
INA-1	0.595251
IDI-1	0.595244
R11F4.1	0.595163
OSTD-1	0.595011
SEA-2	0.594735
CUTI-1	0.594695
LMD-1	0.594348
TBB-4	0.594178
LID-1	0.594069
D2096.6	0.59394
FNTA-1	0.593935
F54C8.7	0.593878
HDA-1	0.59382
ERV-46	0.593743
MLT-8	0.593558
FKB-4	0.59349
BATH-42	0.59292
TOE-4	0.592492
SAMS-4	0.591941
NHR-45	0.591933
H10E21.4	0.591916
ARP-11	0.591673
F01D5.6	0.591621
DCN-1	0.591593
SPAT-3	0.591577
MUT-15	0.59156
Y119D3B.12	0.591498
NHR-91	0.59149
EAK-7	0.591329
M03C11.8	0.591206
UNC-115	0.591142
UBC-9	0.590935
SNRP-200	0.5907
STO-1	0.590545
EEA-1	0.590534
DPY-21	0.590333
CALU-2	0.590157
SPR-4	0.590035
LIN-36	0.58991
CSNK-1	0.589886
NPP-14	0.589813
MAFR-1	0.589794
F59E12.1	0.589743
COPE-1	0.589393
R102.5	0.589063
Y57G11C.3	0.588678
MAU-8	0.587843
FATH-1	0.587737
T06D8.3	0.587056
NHR-12	0.587008
VPS-32.1	0.586935
NSY-4	0.586642
NSY-7	0.586609
F33D11.10	0.586482
ULA-1	0.586232
SFA-1	0.586215
CUTL-16	0.586043
MDT-11	0.585869
NPP-18	0.58567
C49H3.16	0.585663
ATG-18	0.585181
DMD-7	0.585176
R04A9.7	0.585114
LBP-3	0.585057
Y73F8A.26	0.585054
MOG-4	0.584911
C02F5.13	0.584809
CHD-1	0.584481
HCH-1	0.584388
RPT-6	0.584376
FLCN-1	0.584084
AAGR-4	0.58397
ZK287.1	0.583649
WAPL-1	0.583627
BUS-19	0.58338
UNC-70	0.583295
F57B10.5	0.583288
EPG-6	0.583237
C33H5.8	0.583114
ETC-1	0.582972
CLS-2	0.582755
MKS-2	0.582604
INS-2	0.582574
MRCK-1	0.582452
FKH-2	0.582398
ARL-3	0.58239
CGP-1	0.582381
LET-756	0.582287
QUA-1	0.582229
SZY-2	0.581237
SDS-22	0.581002
MUT-16	0.580974
CDC-6	0.580854
LET-413	0.580796
EMO-1	0.580538
PHF-30	0.580327
CEH-30	0.580179
BLOS-9	0.58008
HAM-2	0.57989
NOVA-1	0.579807
SET-18	0.579772
LAAT-1	0.579629
C15C6.1	0.579549
FOX-1	0.579469
ICP-1	0.579305
F58H1.3	0.57924
F38B7.3	0.578901
FRM-2	0.578841
CHT-2	0.578799
RPB-5	0.578793
NSTP-10	0.578781
DPL-1	0.578325
F32H2.6	0.578047
CEH-16	0.578034
GPB-2	0.578027
F31E8.4	0.577991
T05B11.1	0.577821
LGC-27	0.57782
NAS-7	0.57775
SET-19	0.577711
END-1	0.577634
MAB-20	0.577443
ROM-1	0.577408
F52G3.1	0.576982
DNJ-13	0.576842
VHA-8	0.576739
B0334.4	0.576637
SNR-1	0.576628
FBXB-74	0.576407
MVB-12	0.576275
COL-65	0.576267
PPT-1	0.576148
SHN-1	0.576146
T05G5.1	0.57603
IGCM-1	0.575749
BRF-1	0.575599
UNC-85	0.57547
Y71G12B.25	0.575413
F54D5.11	0.575056
TAG-120	0.574989
ZK792.7	0.574924
UNC-108	0.574266
UNC-94	0.573791
TAM-1	0.57368
KIN-18	0.573436
GEM-4	0.573402
PRX-14	0.573151
MTK-1	0.573143
FKB-5	0.57305
KIN-19	0.572631
LRP-1	0.572432
LIN-8	0.572428
C28H8.4	0.572302
CHIL-10	0.572274
C34D4.4	0.572249
DNJ-8	0.572226
T04C12.1	0.572163
M01E5.4	0.572046
TSP-7	0.571936
R01B10.4	0.571878
CFZ-2	0.571689
SUP-35	0.571339
F46H5.4	0.571173
ERG-28	0.571043
F10D11.6	0.571041
PABP-2	0.570891
RET-1	0.570673
F19F10.9	0.57056
ELT-1	0.570138
K10B2.4	0.569539
SWAN-1	0.569526
LRON-11	0.569517
CED-10	0.569339
C06G1.1	0.569126
R12E2.11	0.568708
FRH-1	0.568581
UGT-50	0.568527
WDR-48	0.568499
LPR-7	0.568418
CAPG-1	0.568303
B0025.4	0.56807
ULP-4	0.567909
LET-60	0.567814
ZK856.11	0.567789
B0228.6	0.567675
KPC-1	0.5676
NHR-232	0.567548
NXT-1	0.567465
SSUP-72	0.567448
CLEC-266	0.567252
LGL-1	0.567211
MNP-1	0.56717
NXF-1	0.56717
BED-2	0.566901
T08G11.4	0.566696
ARI-1	0.566634
CDK-1	0.56661
TAG-294	0.566524
F54C9.9	0.566465
R07E5.7	0.566364
C36B1.11	0.566223
T22C1.4	0.565857
Y71F9AL.6	0.565572
Y57G11C.33	0.565545
MOG-3	0.56551
R151.6	0.565501
EXC-9	0.565486
SAM-10	0.565407
ZK1320.7	0.565355
F53C3.3	0.565339
EPG-2	0.565004
F32D8.7	0.564967
EMC-5	0.564944
TEN-1	0.56489
LST-1	0.564711
ZK632.10	0.564497
HIS-54	0.564207
PAS-3	0.564195
F52B11.2	0.563813
LIN-56	0.563613
C25A1.4	0.56318
CSN-6	0.562779
MTR-4	0.562619
MOG-5	0.562473
F46C8.3	0.562412
IGDB-1	0.562245
HSP-70	0.562093
Y46G5A.7	0.56205
TBX-8	0.561705
VGLN-1	0.561671
TAF-4	0.561523
CEH-6	0.561508
F35G12.7	0.56146
CEH-19	0.561023
MDT-9	0.560974
EGL-46	0.560927
C40A11.6	0.56089
HIS-32	0.560846
SOMI-1	0.560802
NLP-31	0.560503
C06G3.6	0.560283
NRA-3	0.560253
CCM-3	0.560222
F37B12.3	0.560067
SSL-1	0.560047
NBET-1	0.559838
EFN-2	0.559677
C27B7.2	0.559254
MAEA-1	0.558932
SYX-7	0.558585
VAMP-7	0.558536
T26C5.2	0.55851
MAM-8	0.558465
K01A2.4	0.558414
F17C11.7	0.558296
SEC-24.2	0.558285
WDR-4	0.55808
F53F4.14	0.558028
Y32H12A.8	0.557945
M03E7.2	0.557934
PELI-1	0.557922
ZGPA-1	0.557897
HMP-2	0.557799
Y57E12AL.1	0.557684
LGC-22	0.557379
IGCM-4	0.557041
PPFR-1	0.556953
Y54E10BR.5	0.55686
HLH-4	0.556818
HHAT-1	0.556687
PLP-1	0.556581
D1044.1	0.556519
F37B4.10	0.556473
OGA-1	0.556425
TTR-37	0.55616
K10D6.2	0.556073
NHR-62	0.555874
NOS-2	0.555862
SQV-7	0.55582
F37A4.3	0.555738
USP-46	0.555656
VAB-3	0.55552
DNC-6	0.555514
SAM-4	0.555367
USE-1	0.555341
SIAH-1	0.55531
F01G4.5	0.555196
EMC-6	0.555074
VPS-34	0.555073
SMA-5	0.555059
COL-90	0.554952
IKB-1	0.554746
NOP-1	0.554715
W09G3.8	0.554466
LTD-1	0.554394
TAP-1	0.554368
SUR-6	0.55426
UBC-16	0.553681
EMB-5	0.553615
C53A5.17	0.553358
MAT-1	0.55332
ARCH-1	0.552833
T06D8.10	0.552777
PLR-1	0.552373
NRDE-3	0.552143
ZAG-1	0.552098
R144.6	0.551941
DGK-2	0.55193
C01A2.4	0.551635
R148.5	0.551511
EVA-1	0.551476
F47B10.9	0.551396
ACOX-3	0.551177
ACDH-12	0.551055
NRDE-2	0.550913
F11A10.5	0.550897
T07F10.3	0.550849
K12H4.4	0.55083
C24D10.4	0.550805
LIM-7	0.550715
PBS-2	0.550674
NPP-4	0.550502
R10E4.9	0.550494
ATG-16.1	0.550337
R03E9.2	0.550193
C34C12.6	0.550021
SOR-1	0.549829
GMEB-1	0.549804
C34D10.1	0.549632
DSH-1	0.549547
T05G5.5	0.549281
C14C10.5	0.548962
F23H12.5	0.548958
RBM-22	0.548932
UNC-120	0.548725
F10D7.5	0.548591
ZK546.2	0.548577
F22B5.10	0.548533
UFD-3	0.548415
DEX-1	0.548307
C05G5.5	0.5481
COL-144	0.548075
CTR-9	0.547831
SRR-4	0.547563
ACL-14	0.547551
CUTL-8	0.547258
C05E11.3	0.547205
CUC-1	0.547123
GCK-2	0.547034
FOS-1	0.546847
NIPI-3	0.546622
F54F2.9	0.546498
DIP-2	0.546412
B0546.4	0.546407
C41H7.6	0.54634
DCT-1	0.546333
ANC-1	0.546293
PBS-4	0.545854
ZTF-3	0.545836
NHR-131	0.545767
MFAP-1	0.545704
UNC-78	0.545673
F44E2.7	0.545627
PERM-3	0.545248
SAS-6	0.545169
UNC-76	0.545122
NONO-1	0.545117
MADF-2	0.545068
MIZ-1	0.544846
FKH-10	0.544841
PTC-3	0.544796
EFK-1	0.544713
TAF-10	0.544645
EBP-2	0.544514
TLI-1	0.544505
F59B10.3	0.544152
F33D4.4	0.544068
ACBP-5	0.543996
TAG-321	0.543878
T06D8.7	0.543846
T27A3.7	0.543762
CPT-1	0.543593
CEH-21	0.543544
CEH-39	0.543477
KNL-2	0.543456
YAP-1	0.543082
F01D5.10	0.542997
F01G10.10	0.542973
NHL-2	0.542851
RSU-1	0.542671
MLT-10	0.542662
LGC-21	0.54264
CAPG-2	0.542635
DNJ-2	0.542563
DIE-1	0.542449
SLC-17.1	0.542413
NCL-1	0.542365
GST-20	0.542319
T04H1.5	0.542273
UNC-14	0.542203
TCTN-1	0.542198
HOG-1	0.542114
CEH-40	0.541986
VPS-51	0.541944
MIX-1	0.541937
C34E7.4	0.541933
NHR-152	0.54189
XNP-1	0.541654
C17H11.6	0.541608
MIG-22	0.541249
SNX-27	0.541096
F26D11.1	0.540901
C42C1.13	0.540901
NFYB-1	0.540857
ZC506.1	0.54084
ARX-7	0.54071
F25B5.6	0.540611
F32D8.13	0.540403
SDN-1	0.540373
F23F1.4	0.540273
F54C8.4	0.540116
PXD-1	0.540024
Y39B6A.36	0.539627
NHR-43	0.539599
Y38H8A.1	0.539471
TOL-1	0.53937
Y97E10AR.6	0.538922
GSK-3	0.538914
HIS-30	0.538904
HIS-33	0.538904
W04A8.1	0.538745
Y62E10A.2	0.538607
F28C10.3	0.538577
F52D10.2	0.538389
F38E9.5	0.538372
F13E6.5	0.538295
MATH-33	0.538254
C35D10.6	0.538116
COL-113	0.538047
XBP-1	0.537697
SUT-2	0.537665
ERD-2	0.5376
NHR-180	0.537576
HDA-6	0.537484
MRPS-21	0.537392
PQN-68	0.537283
MES-3	0.537067
SQV-5	0.537031
T28D9.3	0.53672
K10C3.4	0.536719
R05D3.8	0.536706
DHHC-10	0.536677
C48B6.2	0.536655
MADF-11	0.536651
LRX-1	0.536496
2L52.1	0.536397
LIN-42	0.536346
LIN-12	0.536333
C42C1.11	0.536285
ELT-7	0.536189
WRT-6	0.536072
MOP-25.2	0.536003
CDK-12	0.535951
T20F10.2	0.535889
D2063.1	0.535866
Y34B4A.7	0.535831
F56C9.8	0.535782
NHR-69	0.535743
C53D6.6	0.535731
SAPS-1	0.535637
TTB-1	0.535564
F26F12.4	0.535505
T26A8.1	0.535481
ZK673.2	0.535419
COL-14	0.535248
C27C12.4	0.535153
W04B5.2	0.535099
ZK652.6	0.535062
NHR-46	0.534988
PEN-2	0.534976
DSL-6	0.534912
EEL-1	0.534856
UNC-119	0.534783
EOR-2	0.534673
HLH-15	0.534337
DNC-1	0.534333
T09F5.1	0.534329
R10D12.1	0.53394
TIPN-1	0.533909
LPD-8	0.533824
TBX-9	0.53379
LSM-8	0.533747
CES-1	0.533713
C14B9.2	0.533597
SWSN-7	0.533468
LIN-39	0.533406
TSP-21	0.533399
NHR-53	0.533338
KGB-1	0.533163
C49H3.4	0.533084
SPTF-1	0.532893
Y37E11B.1	0.532814
UNC-44	0.532701
GEI-13	0.532652
C25F6.7	0.53242
SUP-12	0.532314
NID-1	0.532252
ALH-13	0.532216
PTRN-1	0.532185
NHR-136	0.532131
MADF-1	0.532107
CUTC-1	0.532084
Y25C1A.13	0.532083
BLI-5	0.531925
BRC-2	0.531896
RGS-1	0.531761
CEY-1	0.531377
ULP-2	0.531035
ATF-5	0.53086
HSP-16.11	0.530786
XBX-6	0.530702
LIPS-9	0.530666
PKC-3	0.530433
ASD-1	0.530191
LMTR-2	0.530023
RIG-4	0.529962
SEX-1	0.529686
HMG-1.2	0.529643
MIG-38	0.529638
SGT-1	0.529513
Y66D12A.21	0.529503
F54B3.1	0.529386
ZK836.3	0.529181
RAB-21	0.529165
PRK-2	0.529055
ZK512.1	0.529054
TAB-1	0.528983
C32H11.5	0.52888
TAF-1	0.528776
C41H7.4	0.528567
LIN-59	0.528392
C07E3.10	0.528319
MLC-5	0.528186
EPG-8	0.528089
T22C1.3	0.527994
UNC-3	0.527922
D2030.3	0.527868
F25G6.8	0.527736
ELPC-1	0.527443
NCAM-1	0.527173
TYMS-1	0.526825
CHD-7	0.526776
STA-1	0.526662
C24B5.4	0.526561
CUP-16	0.526536
Y63D3A.8	0.526513
LRON-2	0.526095
SLD-5	0.525915
SYM-4	0.525801
T27F6.8	0.525733
T26G10.1	0.525694
TCL-2	0.525187
LIN-54	0.525078
F48E3.6	0.52488
Y106G6H.16	0.524754
Y11D7A.9	0.524719
C05E7.2	0.524696
PPTR-1	0.524662
BATH-10	0.524487
M02B1.3	0.524461
ADBP-1	0.524322
CASH-1	0.524259
FRG-1	0.524094
VPR-1	0.523985
T09B9.1	0.523985
STDH-1	0.523582
MAPK-15	0.523571
PBS-6	0.523452
HSP-12.1	0.523429
T01C3.2	0.52342
TBG-1	0.523311
F25H9.2	0.523285
COL-172	0.523266
HCP-1	0.523201
F43G9.12	0.523074
SFRP-1	0.523052
DIV-1	0.522513
CZW-1	0.522398
Y6D1A.2	0.522387
SEC-61	0.522338
MAPH-9	0.522255
PQE-1	0.52223
SGN-1	0.522153
C49H3.9	0.522088
DVC-1	0.522032
RIOK-3	0.521973
CLR-1	0.521907
TRX-3	0.521898
SCP-1	0.521841
NEKL-2	0.521518
T05E7.4	0.521468
RPN-1	0.521438
AMAN-2	0.521338
ZYG-9	0.521159
AAP-1	0.521128
DPY-18	0.521049
Y38H6C.16	0.521041
COL-54	0.520991
GLB-26	0.520588
MBF-1	0.520448
R07G3.8	0.520447
T19B10.5	0.520292
SYP-3	0.520264
HLH-13	0.520242
T25D10.4	0.520234
RNP-2	0.520086
SKR-16	0.52004
Y48G10A.3	0.519977
K07B1.4	0.519949
EKL-4	0.5199
ELT-4	0.519883
NHR-67	0.519801
NRA-1	0.519667
NLP-48	0.5196
LIPS-7	0.51951
PFD-2	0.519398
W01C8.5	0.519233
C32E8.5	0.519169
BICD-1	0.519157
SPN-4	0.518938
F49C12.12	0.518865
VAB-8	0.518829
CYN-17	0.518799
CEH-88	0.51872
PAXT-1	0.518644
BEST-18	0.518323
AAT-3	0.518297
NHR-103	0.517988
C47B2.2	0.517897
TAG-325	0.517701
EYA-1	0.517616
BMY-1	0.517405
NAB-1	0.517322
T01G9.2	0.517246
R07E5.1	0.51715
Y71F9B.9	0.517045
LEM-3	0.516959
F38A1.8	0.516739
F44E2.6	0.516706
UGT-57	0.516461
PIX-1	0.516451
ALR-1	0.516394
GLS-1	0.516388
F13H10.8	0.516335
ACS-9	0.516332
COL-97	0.516132
ZK632.12	0.515905
REI-2	0.515899
W05H12.2	0.515773
CYP-29A2	0.515693
DNJ-27	0.515687
ELPC-4	0.515548
CAR-1	0.515516
Y69H2.9	0.515427
UBC-3	0.515385
UNC-23	0.515301
F59B2.8	0.515284
CUL-2	0.515259
COL-115	0.515212
HND-1	0.515181
Y25C1A.7	0.515138
OST-1	0.514971
PQN-87	0.514957
T28C6.3	0.514888
CPT-4	0.514863
ZK154.6	0.514704
Y54G2A.18	0.514547
C09F9.2	0.514506
EBAX-1	0.514485
INX-7	0.514426
CTL-1	0.514298
AJM-1	0.514262
HIS-45	0.514235
TSP-14	0.514156
PRX-19	0.514144
F21F3.7	0.513918
ZIG-4	0.513838
DGN-1	0.51367
F32H2.10	0.513512
KBP-4	0.513385
R04B3.2	0.513212
HPO-28	0.51305
CLIC-1	0.512998
SEC-16	0.512932
BRO-1	0.512899
SAND-1	0.512861
NOL-10	0.512754
MDF-1	0.512682
PHG-1	0.51245
SYG-2	0.512434
K09C6.2	0.512426
F32A5.4	0.512201
GLY-12	0.512172
LPD-2	0.512129
ZK546.14	0.512127
JMJD-1.2	0.511756
MIG-5	0.511683
DHC-1	0.511635
ZTF-6	0.511533
RSP-4	0.511509
EVL-18	0.51146
HID-1	0.511289
DSBN-1	0.511266
K01G5.8	0.511134
GEI-8	0.51105
PTC-1	0.510833
T27E4.1	0.510829
T07A9.10	0.51051
CEH-36	0.510387
Y59A8B.8	0.510178
IFE-4	0.510067
WDR-20	0.510048
Y73C8B.2	0.509835
ZIP-10	0.509528
C27A12.6	0.509395
F21D5.7	0.5093
CBN-1	0.509277
ORC-2	0.509272
C25A11.2	0.509226
LAB-1	0.508902
C01F1.3	0.508849
SGO-1	0.508849
F13H6.3	0.508702
ZC190.4	0.508693
CUTL-5	0.508689
DRSH-1	0.508519
GRDN-1	0.508508
W07G4.3	0.50848
VPS-28	0.508406
C02D5.4	0.508209
NPP-5	0.50815
F40B5.2	0.508079
T26A5.8	0.507933
SEK-1	0.507902
M04F3.4	0.507887
RCAN-1	0.507871
K01A2.5	0.507854
BATH-39	0.507723
CAP-1	0.507722
CIC-1	0.507688
NHR-50	0.507663
R03D7.4	0.507592
SDC-2	0.507352
ZIP-2	0.507079
C52B9.4	0.507009
ZC13.1	0.506894
COPA-1	0.506838
RIC-3	0.506758
HMG-1.1	0.506726
OTUB-4	0.506617
CUL-5	0.506584
SMA-2	0.506557
PRP-3	0.506549
EXC-4	0.506545
FLI-1	0.506472
ILYS-4	0.506414
C01F1.5	0.50641
HIM-18	0.506358
ZC449.1	0.506301
R11D1.10	0.506288
TTR-52	0.506262
HIS-61	0.506043
C39B10.7	0.506029
PEK-1	0.505963
UGT-5	0.505902
LNP-1	0.505831
IMB-1	0.505561
T23F2.4	0.505554
K11D12.7	0.505471
C43H6.3	0.50545
KBP-3	0.504987
MAK-2	0.504953
DOT-1.1	0.504945
PYR-1	0.504871
ALX-1	0.504784
EHS-1	0.504651
F59B2.3	0.504429
PGES-2	0.504414
GSP-1	0.504363
F09E8.2	0.504305
R10E4.1	0.504304
KLP-18	0.504204
VALV-1	0.504122
WDFY-3	0.504094
F10C2.4	0.503977
DPY-23	0.503962
ZC434.4	0.503955
MNAT-1	0.503891
DDB-1	0.503766
T14G10.5	0.503569
HIS-1	0.503417
C01G6.5	0.503215
ZK686.3	0.503153
F10E9.5	0.503063
ARP-1	0.50295
C36B7.6	0.502798
C18B12.4	0.502685
UNC-61	0.502599
CWN-1	0.502432
SYF-2	0.502318
FBXB-52	0.502245
F26A10.2	0.502204
CAP-2	0.50217
UFBP-1	0.502129
MAB-21	0.502088
THOC-5	0.502069
K07A1.17	0.502037
C05G5.3	0.501881
COGC-2	0.501794
SET-17	0.501778
NHR-183	0.501684
SMC-4	0.50163
F59E12.9	0.50158
GLY-11	0.501459
UNC-33	0.501435
PRPF-4	0.501301
ZTF-18	0.501266
HGRS-1	0.501256
SNR-6	0.50123
SCPL-3	0.501194
COL-182	0.501108
W03C9.2	0.501088
VMS-1	0.501057
LET-711	0.501056
DCAP-2	0.500901
ZK512.11	0.500812
TSP-9	0.500811
CYK-4	0.500786
HMG-6	0.500696
SPR-5	0.500639
GPX-1	0.500548
ABHD-5.2	0.500547
R144.3	0.500512
SMG-2	0.500391
NATC-2	0.500297
ZTF-13	0.500146

## Sheet: anti-longevity-genage
gene	predicted prob of pro-longevity
COL-93	0.0158403
RPS-10	0.0390678
RPL-23	0.0398373
RPL-17	0.0406391
IFF-1	0.0413807
RPS-0	0.041841
RIL-1	0.0448708
RPS-5	0.0452188
RPL-30	0.0466707
RPS-23	0.0493113
RPS-20	0.0496443
RPL-10	0.0504917
RPS-11	0.0526395
MTL-2	0.0548791
RPS-26	0.0575492
RPS-14	0.0590457
RPS-3	0.0629592
RPL-9	0.0631847
R53.4	0.0688901
VIT-1	0.0696109
RPL-3	0.0719315
EEF-1A.1	0.072973
RPL-19	0.0732935
RPL-7A	0.0750546
CCO-2	0.0766594
C33F10.12	0.0779182
ANT-1.1	0.0780914
ATP-5	0.0795839
RPS-12	0.0810843
RPS-6	0.0822816
VIT-2	0.0827358
RPS-8	0.0835801
NUO-1	0.0871158
F26E4.6	0.0889116
NOL-5	0.0895876
DOD-24	0.0897121
ATP-2	0.0898352
VIT-5	0.0899691
UCR-2.3	0.0913762
CCO-1	0.0915432
F36A2.7	0.0917119
RPL-1	0.0921996
RACK-1	0.0929398
TAG-174	0.096438
FAT-4	0.0986674
RPL-7	0.0992513
QARS-1	0.100393
MRPS-9	0.100575
D2030.4	0.10341
T20H4.5	0.105528
RLA-0	0.105532
DOD-19	0.109341
RPL-4	0.109689
Y71H2AM.5	0.110191
ASM-3	0.110241
T02H6.11	0.110783
C36H8.1	0.110921
PES-2.1	0.111451
INX-8	0.113598
IFE-1	0.115457
ULE-1	0.116289
RPS-16	0.11752
CCT-4	0.119015
CYC-2.1	0.119242
MRPL-12	0.122563
RPS-22	0.123012
EIF-3.F	0.123368
ULE-4	0.123921
ATP-4	0.124881
UCR-1	0.12814
DOD-22	0.131472
SAMS-3	0.131924
CDC-25.3	0.132448
ASG-1	0.135228
T27E9.2	0.135528
T07A9.8	0.13659
H28O16.1	0.137086
NDUF-2.2	0.138243
F01G4.6	0.138251
B0511.6	0.138482
NDK-1	0.138523
ELO-2	0.140409
VHA-6	0.142101
ATP-3	0.143015
CLEC-186	0.14342
NUO-6	0.146065
MRPL-47	0.149658
LPD-9	0.150756
ASG-2	0.151317
ASB-1	0.151807
MRPS-30	0.153738
RPL-31	0.153813
TUFM-1	0.154658
TRY-1	0.155554
SCRM-8	0.158508
Y43C5A.3	0.160114
SOD-1	0.160626
TBA-4	0.16141
ELO-1	0.16208
RPA-1	0.165003
ENT-5	0.165578
NHX-2	0.16713
CEC-3	0.167172
PAB-1	0.169117
EIF-1	0.169453
R07E4.3	0.17064
CID-1	0.172122
C46G7.2	0.173366
LARS-2	0.173643
OGDH-1	0.174435
MRPL-2	0.174548
MRPL-37	0.17536
CYC-1	0.17951
F08B4.7	0.180135
B0250.5	0.18048
DOD-17	0.180865
MRPS-10	0.183277
NSUN-5	0.183331
ACDH-13	0.183639
GDH-1	0.184141
F19B6.1	0.185175
RPS-15	0.186802
RPB-8	0.186842
INS-7	0.186982
SPT-4	0.188335
SPE-5	0.188884
ISP-1	0.189389
F02A9.4	0.189859
ZK1127.5	0.191586
KLO-2	0.192193
EIF-3.B	0.193215
PEPT-1	0.19362
F42G10.1	0.19406
SPE-26	0.196239
MICS-1	0.197039
MES-1	0.200008
EIF-3.K	0.200088
MRPS-5	0.200764
TBB-2	0.201068
Y56A3A.19	0.201644
CRN-5	0.202843
CCHL-1	0.202896
CLEC-227	0.203659
PCK-2	0.205736
BCAT-1	0.20623
DRR-2	0.206477
RNR-2	0.208376
NDG-4	0.208475
LYS-8	0.208603
ASB-2	0.208851
NUO-3	0.209037
ALH-6	0.209778
NUO-4	0.212696
DLAT-1	0.215551
F45H10.2	0.21574
C18E9.4	0.216242
DDL-3	0.217471
NOL-1	0.21882
INX-9	0.218993
ACO-2	0.21918
LPD-5	0.219222
SRW-20	0.219534
HTP-3	0.219804
GCY-28	0.220042
F42A6.1	0.220237
DRL-1	0.221593
OLD-1	0.222449
FAT-7	0.222663
SRW-99	0.224886
TBA-7	0.226245
K11B4.1	0.227564
SRW-100	0.227613
EAT-6	0.227767
SLCF-1	0.228354
INS-21	0.228574
NUO-2	0.229415
MFN-1	0.22948
BUB-3	0.23197
DCT-13	0.233227
CYP-33E2	0.233235
R10H10.7	0.234371
TARS-1	0.234461
HPA-1	0.235548
T25B9.1	0.236004
CSP-2	0.236085
MARS-1	0.237621
DES-2	0.237717
EMB-27	0.23801
SRU-17	0.238179
SCL-1	0.239425
ODR-3	0.239432
RHEB-1	0.239445
F11G11.13	0.239562
CCT-1	0.240035
GCY-6	0.240553
GPD-3	0.240618
PGL-1	0.24185
SKR-2	0.241946
FBXA-188	0.24378
GPA-5	0.244006
F26A3.4	0.244174
DLD-1	0.244402
T05A1.5	0.244687
SER-1	0.244967
LYS-6	0.246636
CGT-2	0.247117
AMT-2	0.247205
GPA-11	0.247783
HCF-1	0.248084
GEI-15	0.248333
PGHM-1	0.248657
FZY-1	0.249363
ATAD-3	0.249379
SMA-10	0.250068
SER-4	0.251358
SPG-7	0.253997
PRDX-2	0.255079
DCT-12	0.255373
DOD-20	0.256039
CPN-3	0.256309
GPA-6	0.256756
MRPL-24	0.257228
CED-3	0.258224
MIRO-1	0.258478
GPA-1	0.258734
T23D8.3	0.258918
PAT-6	0.259649
TAX-4	0.263757
APS-1	0.263824
AKT-1	0.264195
IMPT-1	0.264576
TTR-1	0.26506
LBP-8	0.266273
Y43F4B.7	0.266382
RARS-1	0.267821
CCT-6	0.267865
ACE-1	0.269016
SRT-56	0.269468
Y71H2AR.2	0.269679
B0024.4	0.270437
MOD-5	0.270578
DAF-7	0.270926
SCO-1	0.272438
MECR-1	0.272444
EAT-2	0.272538
GPA-10	0.273254
B0546.3	0.274157
DKF-2	0.274165
EAT-3	0.274347
EAT-18	0.274465
GPA-2	0.275188
NAC-3	0.275469
NUO-5	0.275782
K07H8.8	0.27696
PAT-10	0.277109
ABCX-1	0.277844
GPC-1	0.277984
DGK-5	0.278557
MRPS-33	0.279369
INX-14	0.279394
HIM-6	0.28
ITR-1	0.280465
DDL-1	0.280961
SID-2	0.281312
NKCC-1	0.281785
UTX-1	0.284157
PYC-1	0.285245
C47E12.2	0.285357
Y48G1A.4	0.285613
POD-1	0.285926
CHE-3	0.286645
ARF-1.1	0.286701
DAF-28	0.28724
BMK-1	0.28767
KAT-1	0.287926
ACS-5	0.288265
DAF-9	0.28848
MTCH-1	0.289259
AAT-8	0.289275
OSM-1	0.289341
GCY-18	0.289716
ELC-1	0.289859
DAF-10	0.290428
GLP-1	0.29112
PRX-5	0.291126
LBP-7	0.292124
K11D12.9	0.292212
VPS-33.1	0.292573
ELO-5	0.292987
MAOC-1	0.293061
DAF-1	0.294033
CEP-1	0.296523
PNC-1	0.296853
KLF-1	0.298938
F13B6.1	0.299292
DDL-2	0.299725
MPZ-1	0.299823
SKR-5	0.300135
LIN-5	0.30028
NHR-265	0.300824
MDH-1	0.302256
OCR-2	0.302542
INS-18	0.303294
PHB-1	0.303975
GPA-15	0.304097
UBH-4	0.304443
GPA-3	0.305192
EXOS-3	0.305313
SINH-1	0.305544
GPA-8	0.305632
LETM-1	0.30592
MRPL-50	0.307181
HRP-1	0.309268
CNB-1	0.309718
OSM-3	0.310283
TTR-5	0.310858
TIMM-23	0.3122
IFG-1	0.312406
HUS-1	0.312474
F28B3.5	0.313059
RIC-4	0.313599
TOMM-22	0.314369
DCT-15	0.314571
CHE-2	0.315002
LET-23	0.315488
TOM-1	0.315582
IFP-1	0.316047
UNC-13	0.31712
CDC-25.1	0.318121
EGL-45	0.318401
F09F7.5	0.319158
UNC-31	0.319298
IFD-1	0.319332
DOD-18	0.319356
RIL-2	0.319749
POS-1	0.319814
LAGR-1	0.320846
C27B7.7	0.321369
CHN-1	0.322433
UNC-52	0.322483
OSM-5	0.322934
MEL-28	0.32294
GPI-1	0.323237
LIP-1	0.323616
MDH-2	0.323822
EGL-10	0.325393
PFN-2	0.326552
CHE-11	0.326835
ERO-1	0.326971
NRX-1	0.328201
SAS-5	0.32881
CEH-18	0.328973
RLE-1	0.329086
F49C12.9	0.329646
ZC132.3	0.331005
LIN-28	0.331348
DAF-2	0.331493
WAH-1	0.331688
SPL-1	0.332572
NNT-1	0.333252
SGK-1	0.333578
LIN-3	0.333747
EGL-8	0.334211
ERM-1	0.334725
CCT-8	0.334981
EGL-3	0.335
SCD-2	0.336041
TATN-1	0.337051
TRPA-1	0.337907
UNC-10	0.338197
PASH-1	0.339205
F45G2.8	0.340931
TTX-3	0.341152
ODR-2	0.342261
F26E4.4	0.342591
TKT-1	0.343717
CUA-1	0.343783
UNC-26	0.344016
RHA-2	0.344897
NAC-2	0.34518
ACL-11	0.347586
LIPL-4	0.348477
C47D12.2	0.348657
RSKS-1	0.349198
UNC-32	0.349676
CLK-1	0.35101
ODR-7	0.352842
TUB-1	0.354258
NHR-14	0.354476
CKU-70	0.354977
CHK-1	0.355815
PDP-1	0.357174
DAF-4	0.358905
SCA-1	0.359603
K10B4.3	0.359824
MAX-1	0.360445
C11H1.3	0.360871
GPD-2	0.361145
CHE-13	0.361385
FBP-1	0.362948
PAT-4	0.363763
NLP-7	0.367093
KRI-1	0.367102
PDK-1	0.368681
PAR-5	0.369908
CEH-23	0.370739
ZK686.2	0.371459
CDC-48.1	0.371491
TDP-1	0.372952
TES-1	0.375935
VHL-1	0.376479
SEM-5	0.377788
REC-8	0.377904
CBS-1	0.37803
T28D6.4	0.378041
VANG-1	0.378655
MES-2	0.378752
NHR-77	0.379926
CYP-13B1	0.380453
ACS-4	0.380946
NUC-1	0.382479
DAF-15	0.382808
FGT-1	0.382957
TIN-44	0.383723
FMO-2	0.384048
MKK-4	0.384153
IFE-2	0.385044
SET-4	0.386104
ASH-2	0.386183
Y77E11A.7	0.387163
CUP-4	0.387284
SET-9	0.38751
R08E3.3	0.387776
SBT-1	0.389368
NAS-38	0.389382
TTM-5	0.389822
SEL-5	0.392183
MEV-1	0.393124
ATFS-1	0.393277
IDHA-1	0.394451
RAGC-1	0.394567
ARR-1	0.394645
SIP-1	0.394748
SAMS-1	0.395197
HMG-4	0.39528
DHS-21	0.395991
RSR-1	0.398255
DCT-14	0.398438
MRPL-10	0.40057
SMG-1	0.400745
DCR-1	0.400853
F15B9.6	0.401202
MAX-2	0.401203
CTBP-1	0.401989
IFA-3	0.402518
UBH-1	0.40269
CTH-2	0.404329
NARS-1	0.404657
SPTL-1	0.404912
RAGA-1	0.406378
ARGK-1	0.407282
PCH-2	0.408883
TAX-6	0.409673
K08E3.5	0.410101
DLK-1	0.410535
AGE-1	0.411152
T15B12.1	0.411517
RHI-1	0.412598
DCT-11	0.41613
HSP-12.6	0.417431
TPA-1	0.41933
UBH-3	0.420024
LIN-14	0.420924
SET-15	0.421269
IDH-1	0.422017
SAC-1	0.42208
LIN-65	0.42313
MBOA-1	0.423376
M57.2	0.424015
MRP-5	0.424083
WDR-5.1	0.425672
ALG-2	0.426803
RAL-1	0.429689
CHC-1	0.429696
Y39H10A.6	0.429714
DAF-12	0.429732
TRX-1	0.431218
F13G3.7	0.434733
GRLD-1	0.435214
ETS-4	0.435503
HEL-1	0.435519
MEK-2	0.435845
PUP-2	0.438096
JMJD-2	0.438172
LMN-1	0.438836
UNC-83	0.438965
DAF-8	0.439812
WTS-1	0.4412
RNF-5	0.441646
LET-363	0.441857
DAF-6	0.44227
NHR-154	0.442816
WIP-1	0.442856
DAGL-2	0.443553
LBP-9	0.445485
BAR-1	0.448028
TOP-1	0.44869
NHR-119	0.450173
EPC-1	0.451506
GST-10	0.451684
HIS-37	0.453012
FKH-7	0.453324
GST-5	0.455003
NTL-3	0.455496
CYP-42A1	0.455771
HYL-1	0.456407
SET-26	0.456994
IFTA-2	0.459568
ETS-9	0.459973
GOA-1	0.46251
BAF-1	0.462927
OSM-6	0.463151
PTR-23	0.463767
T12E12.1	0.464223
PCM-1	0.46469
ATF-6	0.464927
INS-1	0.465029
Y54E5A.7	0.465137
JNK-1	0.465871
LGG-1	0.466275
YARS-1	0.466519
NPP-2	0.468069
HPL-2	0.468572
MPK-1	0.468592
HPO-31	0.470697
SESN-1	0.473161
HHAT-2	0.473402
CUTL-28	0.474349
HSP-6	0.474729
ABU-11	0.476228
CRTC-1	0.477171
CDK-7	0.477244
EXO-3	0.478106
HLB-1	0.478304
GSA-1	0.479184
CPNA-3	0.480785
ZFH-2	0.481162
NHR-23	0.481901
LDB-1	0.482283
Y55F3AM.3	0.482398
NHR-8	0.48327
LIN-23	0.484078
LET-765	0.484163
BUS-4	0.484401
RCQ-5	0.485479
VPS-36	0.487382
APS-3	0.488681
DAF-19	0.490697
VPS-16	0.49364
LET-418	0.493806
HIS-71	0.495778
PNK-1	0.496905
TTX-1	0.498021
KLO-1	0.499758

## Sheet: anti-longevity-non-genage
gene	predicted prob of pro-longevity
RPL-34	0.0135449
MSP-59	0.0145768
Y59E9AR.7	0.0178954
RPL-39	0.0182711
MSP-57	0.0187105
MSP-81	0.0191315
MSP-113	0.0213925
MSP-19	0.0222165
NLP-27	0.0229563
RPL-11.1	0.0234727
MSP-49	0.0237586
COL-160	0.0237872
MSP-10	0.0238662
MSP-76	0.0242444
MSP-152	0.0243928
COL-80	0.0249609
RPL-36.A	0.0251983
MSD-2	0.0258839
MSP-53	0.026632
SPCH-3	0.0267908
RPL-32	0.0274359
MSP-3	0.0278396
COL-178	0.0281769
RPL-12	0.0287571
MSP-78	0.0288372
COL-184	0.0299339
MSP-64	0.0301763
COL-20	0.0303552
COL-142	0.0306589
MSP-38	0.0310758
MSP-142	0.0311708
RPL-41.2	0.0313193
COL-181	0.0316984
C37A2.7	0.0330769
RPS-9	0.0331837
RPL-22	0.0332025
MSD-4	0.0335188
MSP-40	0.0335668
EEF-1B.1	0.033656
UBL-1	0.0341848
COL-19	0.0350601
RPL-38	0.0356797
RPS-17	0.0363506
COL-147	0.0364208
MSP-50	0.0368991
COL-124	0.0369959
Y38C1AA.7	0.0376895
COL-122	0.0382216
C17F3.1	0.038279
R09B3.2	0.0384509
NLP-28	0.0385247
COL-140	0.038576
MSP-51	0.0401323
MSP-79	0.0404076
SSP-31	0.0407848
R09B3.3	0.0417653
COL-42	0.0417829
COL-143	0.0419331
MSP-45	0.0420116
SSP-19	0.0423805
COL-139	0.0424479
MSP-36	0.0425773
F17E9.5	0.0432224
RPL-33	0.0441248
COL-103	0.0450385
MSP-55	0.0451084
ILYS-5	0.0462038
RPS-21	0.0464641
RPS-25	0.0474921
COL-8	0.0477635
CPR-4	0.0480001
VIT-3	0.0480838
COL-179	0.0493029
COL-106	0.0497649
MSRP-5	0.0503066
MSP-56	0.050416
MSP-77	0.0506197
CPR-5	0.0512472
RPL-28	0.0513198
RPL-15	0.051809
COL-159	0.0518137
COL-129	0.0521548
T21H3.1	0.0524672
F53A9.8	0.0525507
RPL-43	0.0526085
RPL-29	0.0527002
COL-119	0.0532157
RPL-25.2	0.0533545
RPS-29	0.0537019
NLP-26	0.053799
COL-95	0.0542443
COL-98	0.0547251
RPL-14	0.055103
MSD-1	0.0553598
F58F12.1	0.0561483
MSP-65	0.0576411
SMZ-1	0.0579656
RLA-1	0.0585648
COL-81	0.0591309
GRD-3	0.0595751
MSP-33	0.0597084
C25H3.9	0.0601666
SPCH-1	0.0605816
UBQ-2	0.0609529
COL-39	0.0609638
Y82E9BR.3	0.0612426
C33A12.1	0.0615659
RPL-13	0.0619074
RPS-19	0.0620492
C10G11.8	0.0621068
COL-94	0.0626987
VIT-4	0.0629832
RPS-2	0.0632472
RPS-30	0.0633266
ZK813.3	0.0635193
RPL-41.1	0.0640414
RPS-24	0.0642197
RPL-18	0.0653838
RPL-26	0.0658475
HPO-18	0.0660657
F53B6.4	0.066131
RPL-27	0.0663386
COL-92	0.0670673
C33F10.11	0.0670818
COL-133	0.06709
GIPC-1	0.0675304
VIT-6	0.0675426
CLEC-91	0.0676853
RPS-28	0.0679379
RPS-18	0.0679415
C25D7.1	0.0681906
BTB-6	0.0687646
Y37E3.8	0.0695824
MSP-63	0.0699653
W03D8.9	0.0701607
COL-12	0.0701831
EEF-1G	0.0702305
GSP-3	0.0706263
LEC-6	0.0710918
RPS-4	0.0711897
COL-101	0.071416
F32B5.1	0.0718468
F21H7.5	0.0721122
F58E6.5	0.0722631
F56D6.22	0.0727229
W01D2.1	0.0735049
RPS-27	0.0739084
F32D1.5	0.0740141
F45H10.3	0.0742916
ZK813.1	0.0746482
CYC-2.2	0.075223
C27D6.3	0.075705
RPL-35	0.0758678
F40F9.3	0.0759587
NDUF-7	0.0762566
UCR-11	0.0764895
BLI-6	0.0771653
THN-2	0.0772401
LIPL-5	0.0774744
F53F4.10	0.0782
PRG-2	0.0783354
ANT-1.3	0.0785623
RPL-6	0.0787039
GIPC-2	0.0794234
RPL-21	0.0798683
T22B3.3	0.0799979
RPL-36	0.0801877
IFC-1	0.0804973
F56D6.13	0.0804977
COL-62	0.080558
C01G10.14	0.0806739
TNT-2	0.0809494
GLN-2	0.0814958
ANT-1.4	0.0821085
RLA-2	0.0826365
EEF-2	0.0827059
C39H7.1	0.082896
GST-27	0.0829996
GFAT-2	0.0831352
RMD-3	0.0833617
F56D6.20	0.0833619
M28.5	0.0835532
UNC-27	0.084091
F58G1.3	0.0844989
C34B2.8	0.0847326
RPL-5	0.0849465
Y51H1A.3	0.0854374
C05B5.2	0.0856379
COL-96	0.0861377
RPS-1	0.0862164
SKR-8	0.0863236
TCT-1	0.0867827
ZK938.1	0.0872731
RHR-1	0.0875655
R04F11.2	0.0880217
GLDC-1	0.0882788
ALDO-2	0.0885231
COL-149	0.0885938
RPL-16	0.0888323
DHS-11	0.0894019
F29C4.2	0.0894856
F13A7.1	0.089597
F56F4.8	0.089967
C16A3.4	0.0900562
TNI-3	0.0907146
MSH-2	0.0910494
Y69E1A.1	0.09188
F44G4.2	0.0919824
FAT-1	0.0921225
F55D12.6	0.0922435
SKR-9	0.0924445
PRMT-1	0.0926795
MSP-31	0.0932245
RPIA-1	0.093418
CPR-1	0.0934208
C24D10.2	0.0935119
RPS-13	0.0940279
SPCH-2	0.0947937
RPL-37	0.0950339
ASP-14	0.0951061
RPL-24.1	0.095495
Y71G12B.27	0.0955079
D1086.7	0.0961108
K07C5.4	0.0963823
MRPL-18	0.0965047
SPP-1	0.0965424
B0379.2	0.0968438
TIN-10	0.0973092
ECH-7	0.0973328
C09B9.2	0.097483
K07A1.5	0.0978046
R13H9.5	0.0981505
SPP-5	0.0981597
C14B9.10	0.0982949
C02B10.6	0.0983701
EEED8.12	0.0984161
T10E9.4	0.0991924
Y59E9AR.1	0.0996191
C04F12.7	0.0999647
COL-60	0.100153
COL-7	0.1007
CAH-3	0.100772
FAR-2	0.100848
K03H1.12	0.101323
CLEC-265	0.101452
SSP-37	0.101461
COL-117	0.101583
Y39G10AR.16	0.10159
ZK970.8	0.101625
W02D7.4	0.101732
ACDH-8	0.101839
ASP-5	0.101977
CLEC-63	0.10206
CLEC-49	0.102147
DCT-9	0.102168
HIS-70	0.102792
F53A9.6	0.102967
HAAO-1	0.103059
SPP-8	0.103347
MLC-1	0.1039
MRPL-40	0.103919
SPE-17	0.104073
F32B4.2	0.104172
F42G8.10	0.104391
EIF-3.J	0.104397
F28H7.3	0.104661
F56D6.19	0.104673
F36D3.4	0.105441
CLEC-123	0.105635
Y38H8A.3	0.105769
RMD-6	0.105876
COL-135	0.106344
OSM-11	0.106445
K11D12.13	0.106672
TTR-2	0.106683
SKR-7	0.106858
T27A3.5	0.106999
R151.2	0.107443
Y1A5A.1	0.107648
E03H12.7	0.107825
C50F2.5	0.10856
F54C8.1	0.108817
EEF-1B.2	0.108862
RPL-11.2	0.108897
SKR-10	0.108995
M70.3	0.109252
Y45F10C.4	0.109643
T08B6.4	0.10971
MLC-2	0.109711
RPS-7	0.110217
FBXB-82	0.110465
F36H12.10	0.11065
Y19D2B.1	0.111017
HTAS-1	0.111088
MAI-2	0.111277
F52H3.6	0.11173
M28.9	0.111986
F40G12.10	0.112809
AH6.3	0.112869
F36H12.9	0.113362
GST-26	0.11342
ZK550.5	0.113497
C09F9.1	0.113518
TTBK-2	0.113708
F13A2.4	0.113737
C16B8.3	0.113779
F41H10.1	0.114176
LDP-1	0.114423
C18H7.4	0.114542
T15B7.1	0.114632
FUM-1	0.115296
D1081.12	0.115322
MPST-5	0.115449
MPST-6	0.115449
BATH-31	0.115665
C10H11.7	0.115794
F59H6.15	0.115801
F29B9.11	0.116412
R02D5.7	0.116719
K04C1.5	0.116875
FAR-8	0.116907
R13H9.6	0.117147
SNR-7	0.117182
CLEC-209	0.117648
F56A4.2	0.117648
C35E7.10	0.11787
CLEC-48	0.117949
F57F5.1	0.118069
PMT-1	0.118178
COL-175	0.118213
ZK354.2	0.118325
CLEC-222	0.118416
COMP-1	0.118482
T02B11.9	0.118517
F53G12.8	0.118655
FBXB-7	0.118822
RME-2	0.11896
F42C5.5	0.11913
COL-38	0.1192
F52F12.8	0.119266
FBXB-50	0.119344
C36F7.5	0.119444
NAS-20	0.119465
CLEC-73	0.119477
PGL-3	0.119487
F35E12.6	0.119528
F07F6.1	0.119633
CLEC-117	0.119641
ABHD-3.2	0.119911
K06A5.2	0.120175
W02B12.12	0.120335
F09E5.3	0.120435
C47A4.3	0.120582
FIB-1	0.120604
NLP-24	0.12065
ASP-1	0.120899
MUA-6	0.121049
F53F4.18	0.121125
F56D6.14	0.121305
GLN-6	0.121751
DAF-21	0.121881
EIF-2GAMMA	0.122041
COQ-1	0.122227
Y111B2A.2	0.12249
ZK688.10	0.122627
K06A5.3	0.122662
C16C8.18	0.122915
LBP-6	0.123096
ASAH-1	0.12316
K05F1.9	0.123268
F37A4.5	0.123428
SMZ-2	0.123561
Y71G12B.3	0.123818
UBXN-5	0.123845
TTR-15	0.12425
F42A9.7	0.124417
F54D5.4	0.12464
K07H8.9	0.124672
INS-37	0.124731
VDAC-1	0.12526
KEL-10	0.1254
C14C6.5	0.12549
Y44A6D.5	0.125529
F47B3.7	0.125615
C09H5.7	0.125683
FOLT-2	0.125734
T04F3.3	0.125846
CATP-4	0.126007
B0035.13	0.126275
T13F3.8	0.126299
CLEC-79	0.126838
ALG-4	0.126912
C34D4.2	0.126948
C25A8.2	0.127046
CYP-31A2	0.127217
COL-63	0.127222
SCRM-6	0.127356
ALG-3	0.127687
F23B12.1	0.127795
ACS-18	0.128007
F56D6.18	0.128132
MPZ-4	0.128167
C14C10.1	0.128328
IRG-4	0.128334
F47B3.1	0.128383
F47B3.6	0.128383
C48B4.10	0.128435
B0280.17	0.128866
T05F1.8	0.128935
ZK354.7	0.129308
PERM-1	0.12939
SKPO-1	0.129466
SUCH-1	0.129718
DECR-1.2	0.130122
C09B9.4	0.130129
F38H4.6	0.130378
C27D6.11	0.13042
NLP-29	0.130464
K05F6.4	0.1305
T01B11.2	0.130521
F59C6.5	0.13068
SFXN-1.1	0.130949
FBF-1	0.13101
B0454.5	0.131053
BATH-4	0.131329
RPL-2	0.131456
C17H12.3	0.131577
F47B3.4	0.131582
KIN-24	0.13174
CLEC-47	0.131943
ZK849.6	0.131949
K10H10.7	0.132266
T16A9.5	0.132403
ACT-5	0.132461
F56D6.12	0.132708
COL-120	0.132715
UGT-58	0.132824
CLEC-66	0.132955
Y48A6B.7	0.133012
F01D5.1	0.133112
CYP-37A1	0.133139
ACS-10	0.133674
ZK616.8	0.133721
KCA-1	0.133912
ZIP-3	0.134421
F38H4.4	0.134597
F23H11.5	0.134727
FAT-2	0.134816
ZK84.2	0.134976
F11G11.4	0.135079
T06A10.106	0.135103
W03C9.8	0.135215
DLAT-2	0.135227
COL-150	0.135654
COL-167	0.135703
B0244.9	0.135875
AHCY-1	0.135973
GADR-4	0.136045
IDHG-1	0.136123
NKB-2	0.136197
BTB-20	0.136375
TIMM-17B.2	0.136518
F59C6.3	0.136615
CHS-1	0.136703
ZK809.8	0.13673
W03F11.4	0.136811
Y57G7A.6	0.136966
Y66D12A.11	0.137055
T10C6.7	0.137157
Y71H2AM.4	0.137293
SCL-3	0.137346
K12H4.7	0.137566
C50H2.13	0.137577
HIS-10	0.137619
HIS-14	0.137619
HIS-26	0.137619
CPT-5	0.137662
F36H12.3	0.137717
C06A1.3	0.137989
FAT-6	0.138367
T05A7.6	0.13851
RPL-20	0.13855
F14F7.4	0.138731
CHT-3	0.138773
SRI-40	0.138938
Y50E8A.10	0.13909
T12B5.14	0.139366
T06A10.3	0.139623
SNF-5	0.139671
RNR-1	0.140026
C25A8.5	0.140115
K07F5.6	0.1403
C15H11.1	0.140375
Y54G11A.17	0.140869
T24B8.5	0.140907
Y45F10C.2	0.140931
WHT-4	0.14103
MRPS-28	0.141286
R05H5.3	0.141301
KIN-5	0.141499
W09C5.8	0.14162
F54D1.1	0.141626
F14D7.6	0.141857
K03B4.6	0.142011
FIS-1	0.142019
C31H1.5	0.142128
LET-504	0.142187
COL-146	0.142231
DSL-2	0.142343
AAT-6	0.142481
DDX-17	0.142787
COL-138	0.142797
IRLD-3	0.14285
Y48B6A.5	0.142949
PSSY-2	0.142974
W10C8.5	0.14313
ZK622.4	0.143182
TBX-34	0.143311
K03H1.9	0.143359
C01B10.6	0.143436
Y43C5B.2	0.143468
SST-20	0.143534
W01B6.6	0.14368
TTR-56	0.143763
F29B9.7	0.14377
TTR-18	0.143779
RRBS-1	0.143906
K09H9.8	0.144109
AQP-8	0.144123
NDUF-5	0.144215
SFXN-1.3	0.144251
CDC-25.4	0.14449
CPR-8	0.144542
ENDU-2	0.144795
F27C8.5	0.144909
ZK1320.9	0.144912
C39B5.5	0.144925
MRPS-24	0.145001
ACDH-5	0.145049
ENT-3	0.145204
C17H12.12	0.145342
SPP-3	0.145482
CLEC-80	0.145684
FBXA-202	0.145944
CCCH-2	0.146299
F46H5.3	0.146328
Y50D4B.4	0.146365
NAP-1	0.146387
C39D10.7	0.146438
COL-49	0.1465
C49C3.20	0.146668
K02F6.3	0.146742
Y41C4A.18	0.146769
Y49E10.16	0.147053
IRLD-4	0.147053
C15H7.3	0.14738
M05B5.1	0.147403
R13A5.10	0.147488
F58A6.5	0.147597
ASP-2	0.147622
CLEC-97	0.147934
WHT-5	0.147968
IRG-3	0.148066
CDC-48.3	0.148408
C08F11.12	0.14848
T05B4.14	0.148515
BASL-1	0.148695
TTR-31	0.148762
F40H6.1	0.148822
F44G3.7	0.148956
WHT-6	0.149116
D2062.1	0.149195
C55C3.4	0.149287
Y38F1A.7	0.149315
INS-26	0.149324
Y57G11C.6	0.149353
F30A10.12	0.149389
R07H5.8	0.149583
T07E3.2	0.149728
Y113G7C.1	0.149909
T23F6.3	0.150048
K07A3.3	0.150086
ZK418.2	0.150136
CLEC-65	0.150215
C53D6.10	0.150234
LEC-4	0.150248
FKH-3	0.150549
ATHP-3	0.15056
C27D9.1	0.150734
ELO-6	0.150866
LEC-10	0.15089
T04C12.11	0.150961
FLP-12	0.150965
COL-118	0.150966
NEP-8	0.151048
CTC-2	0.151234
LEC-9	0.151303
SNF-9	0.151493
K12D12.5	0.151541
Y50E8A.2	0.151567
F02C9.1	0.151615
FBXB-47	0.151715
ZK546.4	0.151822
COL-88	0.152245
K08D12.3	0.152326
T22C1.9	0.152389
Y32F6A.4	0.152458
MCT-2	0.152477
Y73F4A.2	0.152483
Y37E11AL.2	0.152496
LYS-2	0.15252
ACS-6	0.152594
ZK892.5	0.152604
Y57A10C.11	0.152618
ELO-8	0.152658
DDP-1	0.152758
C56A3.8	0.152937
Y106G6A.4	0.152966
PQN-60	0.153
R10F2.6	0.153065
Y37D8A.5	0.153132
IVD-1	0.153134
T22C1.8	0.153153
W04C9.2	0.15318
CLEC-1	0.153182
F35E12.10	0.153264
T02G6.5	0.153306
ASP-13	0.153315
C27D8.1	0.153393
VHA-7	0.153623
Y106G6G.4	0.153713
EIF-3.I	0.153718
UNC-87	0.153768
NAS-9	0.153851
ZK1248.20	0.15389
ZMP-3	0.153925
H12D21.5	0.153978
R08C7.8	0.154089
Y40H4A.2	0.154309
GFM-1	0.15452
Y116A8C.24	0.154546
F55F8.7	0.154549
C07E3.4	0.154592
Y106G6H.9	0.154688
CLEC-150	0.1547
SFXN-1.2	0.154865
GSS-1	0.155127
WHT-8	0.155184
C14A6.6	0.155198
FBF-2	0.155323
C50D2.3	0.155375
DRD-50	0.155539
T07C4.3	0.155674
F54A3.5	0.155713
SNB-6	0.155742
STR-176	0.155823
K09C6.7	0.155963
TTR-14	0.156024
C46E10.8	0.156044
AC3.5	0.156084
Y54F10BM.6	0.156086
MPS-3	0.156098
D2062.4	0.156465
TTR-46	0.156476
C44B7.5	0.15652
ATP-6	0.156675
VF13D12L.3	0.156759
DEL-6	0.156909
Y54F10AM.5	0.157199
Y81G3A.6	0.157274
ZK1053.2	0.157312
COL-71	0.157412
T26E3.8	0.157434
C33C12.4	0.157645
LSY-27	0.15769
C33F10.8	0.157775
C46G7.1	0.157804
T04A8.8	0.157822
SPE-8	0.157852
SDZ-30	0.157882
F55G11.2	0.158072
F49F1.12	0.158097
K06B4.15	0.158127
ZK228.4	0.158326
PHO-13	0.158342
Y37D8A.8	0.158381
Y69A2AR.3	0.158491
ZC477.2	0.158702
MCT-5	0.158978
C28C12.11	0.15899
TRY-7	0.158999
DLC-6	0.159197
COL-10	0.159201
CLEC-51	0.159203
NAS-19	0.159302
C04E6.5	0.159404
ZK1053.6	0.15942
T06A10.107	0.159439
F56A11.6	0.159471
M176.9	0.159489
ZK673.1	0.159516
SKR-13	0.159524
RPL-42	0.159599
HAF-4	0.159607
ZIM-3	0.159646
FAR-1	0.15978
F20H11.4	0.159823
Y116A8C.23	0.159841
C44C10.3	0.159995
GLT-1	0.159999
FAT-3	0.1601
F47D12.7	0.160213
CLEC-207	0.160308
NLP-17	0.160329
TTR-45	0.160373
F29A7.6	0.160514
W01B6.2	0.160523
C06C6.8	0.160603
Y57G7A.3	0.160643
CLEC-96	0.16069
F57A10.2	0.160744
FBXB-13	0.160792
CLEC-208	0.160802
RPN-6.2	0.160812
CRT-1	0.160913
CLEC-218	0.160959
K03H6.2	0.160988
F54D7.2	0.161036
KIN-26	0.161047
F21D9.2	0.161124
T24D1.3	0.161227
DSB-1	0.16134
Y40H7A.10	0.161415
CYP-31A3	0.161449
C50B6.7	0.16158
R03G8.6	0.161605
Y119D3B.14	0.161679
CBD-1	0.161691
M04G7.1	0.161708
TOMM-20	0.16172
ACT-3	0.16193
K09G1.2	0.161941
T01C8.2	0.161949
KIN-21	0.161964
GFI-1	0.162021
Y15E3A.4	0.162023
PUF-11	0.162064
T19H5.7	0.162073
C35D10.5	0.162079
MLC-7	0.162174
CLEC-62	0.162291
PDHB-1	0.162341
M01A10.1	0.162449
K07H8.5	0.162568
C38D4.7	0.162687
MPZ-6	0.162729
Y82E9BL.6	0.162745
Y116A8C.38	0.162963
FLP-8	0.163096
C01G5.4	0.163107
F38A5.6	0.163155
VAP-1	0.163186
INS-28	0.163272
MAPH-1.2	0.16333
F14H12.7	0.163398
TAG-164	0.163412
GSY-1	0.163572
MRPL-49	0.163575
T25B9.4	0.163577
GLN-5	0.163725
F19C7.1	0.163779
CLEC-190	0.1639
MRPS-17	0.164075
W09C5.1	0.164391
C04B4.2	0.164412
CLEC-197	0.164472
Y39H10B.2	0.16448
ZK1321.4	0.164523
TBA-1	0.164524
MRPL-30	0.164524
MRPL-38	0.164557
ICD-2	0.164641
T08H10.3	0.164649
PZF-1	0.164763
INS-31	0.164781
F49E11.7	0.164788
COL-155	0.164856
T23B7.2	0.164861
Y116A8C.19	0.165102
C47E12.10	0.165135
DECR-1.3	0.165198
C30G7.4	0.165258
C24D10.1	0.165433
EFSC-1	0.165543
C50F4.10	0.165606
CYB-2.2	0.165671
NEP-13	0.165768
ZK287.9	0.165834
F21F3.2	0.16593
T05E12.3	0.166174
EIF-2BETA	0.16619
ZC376.2	0.166206
ENU-3.6	0.166224
ABCF-2	0.166287
CBS-2	0.166474
ZC581.7	0.166487
ZIG-12	0.166538
CISD-3.1	0.166543
UGT-47	0.166616
F38A5.22	0.166619
F28A10.7	0.166772
RPAC-40	0.16687
K07C11.3	0.166881
MRPS-18B	0.166912
W09C3.2	0.166963
PQN-84	0.167075
PHO-7	0.167078
T03F6.6	0.167139
R06C1.4	0.167153
CYN-7	0.167158
F42A9.3	0.167163
PGAM-5	0.167274
T06E4.5	0.167363
F58D2.2	0.167516
C10G11.10	0.167567
Y65B4BL.4	0.167638
CEH-82	0.167649
ZK616.65	0.167651
SPE-41	0.167766
R03D7.8	0.167869
EFN-3	0.167904
C17G1.2	0.168054
CEPT-1	0.168115
ACP-6	0.168148
R04B5.1	0.168249
Y46E12BL.2	0.168267
B0513.5	0.168434
ACS-15	0.168486
BTB-2	0.168563
CLEC-50	0.168733
CLEC-223	0.168737
Y53G8AL.2	0.168774
M01F1.3	0.168801
T08B1.1	0.168807
CCT-5	0.168861
K04G2.10	0.169024
F44D12.6	0.169077
T10B5.7	0.169109
F53C3.1	0.169187
C06A5.8	0.169224
Y54E2A.7	0.169296
B0432.11	0.16936
FLP-10	0.169413
GSR-1	0.169483
F53F4.11	0.169616
ADM-4	0.169651
F22H10.2	0.169698
CLEC-157	0.16972
FAAH-3	0.169794
K11H3.8	0.169835
MRPL-45	0.169883
KIN-16	0.169973
COL-180	0.170056
K11D9.3	0.170195
TWK-5	0.170207
TBH-1	0.170322
F59A1.15	0.170329
SNF-2	0.170359
C34H4.2	0.170446
M70.1	0.170475
CLEC-204	0.170515
T19D12.10	0.170724
ASM-2	0.17073
FBXB-43	0.170872
F38A5.8	0.170876
POLG-1	0.170905
IFA-1	0.17094
CLEC-133	0.171183
Y69E1A.3	0.171235
SEA-1	0.171308
R13A1.3	0.171391
SDZ-18	0.171405
BEST-25	0.171438
ENT-4	0.171527
CLEC-153	0.171579
C35D6.3	0.171619
F23C8.7	0.171634
LET-858	0.171638
NEP-17	0.171671
H04J21.1	0.171721
RNH-1.1	0.172034
CLEC-85	0.172053
Y38H8A.4	0.172105
C24H11.1	0.172116
Y54G2A.13	0.172145
F40G9.9	0.172176
LIPS-15	0.172195
K07A1.1	0.172238
IRLD-14	0.17226
Y27F2A.6	0.172271
ACP-7	0.172294
LYS-1	0.172396
T28D6.6	0.172422
ABHD-3.1	0.172437
Y17G9B.4	0.172442
C30E1.2	0.172448
VAP-2	0.17249
TSFM-1	0.172639
CLEC-95	0.172658
OAC-9	0.172669
K05F1.8	0.172716
GLH-3	0.172831
C14F11.4	0.172873
MYO-2	0.172897
F47B3.2	0.173143
ZK892.3	0.173319
LBP-2	0.173383
CLEC-119	0.173432
MPPA-1	0.173498
F13H8.12	0.173512
ZK354.8	0.173543
Y47G6A.3	0.173603
ZK484.7	0.173703
K05F6.10	0.173886
GPX-3	0.173905
TSP-8	0.173937
C16A11.3	0.173966
CLEC-219	0.173982
RBG-3	0.17399
HDL-2	0.174095
CLP-6	0.174132
DDO-1	0.174208
C14A4.8	0.174244
K07E8.7	0.174376
CYSL-4	0.174426
M05B5.7	0.174452
FAR-6	0.17446
Y38H8A.2	0.174492
TTR-13	0.174587
TIN-9.2	0.174658
T02E1.6	0.174658
CLEC-10	0.174671
EGG-1	0.174712
CLEC-7	0.174834
SEL-9	0.174906
DPM-3	0.175045
Y65B4A.7	0.175053
K09E4.1	0.175073
ZK550.2	0.175082
B0025.5	0.175102
MUP-2	0.175181
IRLD-18	0.175238
GSP-4	0.17532
EGG-4	0.17533
F59E11.5	0.175334
Y53F4B.11	0.175337
PCP-2	0.175474
SPIN-3	0.175518
F19H6.4	0.17554
F28B4.3	0.175581
MYO-1	0.175618
STH-1	0.175661
F42A9.6	0.175769
OAC-20	0.175826
C42C1.9	0.175867
NEP-20	0.175898
C14A6.7	0.175931
PAPL-1	0.175995
T06C10.3	0.175998
C16C10.1	0.17608
F10A3.4	0.176096
FBXB-96	0.176214
ELLI-1	0.17633
NDUO-6	0.176382
Y23H5B.12	0.176406
Y119C1B.1	0.176428
FBXB-46	0.176465
HMT-1	0.176466
ZC376.8	0.176519
AGT-1	0.176528
F56B3.6	0.176573
NAS-11	0.176589
R160.3	0.176639
Y69H2.3	0.176648
FBXB-67	0.176665
T25E12.16	0.176689
EGG-2	0.176703
Y18D10A.23	0.176789
FTR-1	0.176862
F58H1.6	0.176895
Y37F4.5	0.176912
F41G3.18	0.176916
F54C1.8	0.177039
C09B9.7	0.177051
CLEC-99	0.177081
C07D8.6	0.177111
F11D5.7	0.177125
Y69A2AR.32	0.177131
C55C3.3	0.177174
R155.3	0.177285
F19C7.2	0.177376
C18H9.5	0.177395
RPB-10	0.177421
C35B1.3	0.177497
F13H8.3	0.177558
COL-161	0.177643
TBCD-1	0.177647
Y48E1B.8	0.177695
C44B9.3	0.177736
M02B1.4	0.177793
F53F8.3	0.177877
F56F4.3	0.177962
T02E1.7	0.177966
C24H11.2	0.177988
C27F2.7	0.178021
F55G1.6	0.178066
Y17G7B.19	0.178146
C06C6.7	0.178147
TNT-4	0.178168
LON-1	0.17819
GTA-1	0.17824
C35A5.3	0.17829
NEP-9	0.178312
PCK-3	0.178319
PFK-1.2	0.178343
Y47D9A.5	0.178383
MCCC-1	0.178447
W01B6.5	0.178456
Y57G11C.48	0.178633
ZC416.6	0.178638
BEST-12	0.178663
Y105C5B.17	0.178673
F36G9.13	0.178722
C50C3.2	0.178735
T04A11.2	0.178735
T04A11.5	0.178735
SKPO-3	0.178838
D2062.5	0.178869
CAH-5	0.178955
ECH-5	0.17896
MAP-1	0.179004
R02F2.8	0.179013
DARS-1	0.179024
STR-55	0.17915
C52B11.5	0.179306
D1081.11	0.179371
ZC250.5	0.179439
TIN-13	0.179489
BTB-14	0.179495
HACD-1	0.179627
KLP-16	0.179673
FER-1	0.179674
UGT-22	0.179708
CEY-4	0.179853
C29E4.14	0.17988
IRLD-7	0.17999
F40E12.2	0.180117
TTR-12	0.180166
CIF-1	0.180254
TTR-9	0.180332
F49F1.15	0.180346
COSA-1	0.1806
WHT-7	0.180642
CLEC-54	0.180723
NEP-10	0.180822
C43E11.5	0.180842
FUT-5	0.180904
Y43C5B.3	0.181005
CTPS-1	0.181058
T10C6.10	0.181069
F20D6.6	0.181118
C44B9.2	0.18118
CLEC-151	0.181195
F44F4.9	0.181218
RFL-1	0.181221
F10G8.1	0.181276
Y39B6A.30	0.18133
NLP-12	0.181335
ZK354.6	0.181367
MCT-3	0.181401
C46A5.1	0.181511
FBXB-57	0.18158
TAG-329	0.181593
SUCA-1	0.181594
MSD-3	0.18171
C17H12.5	0.181757
MPST-3	0.181805
CPN-4	0.181821
BEST-10	0.181825
F33D11.1	0.181833
ASAH-2	0.181862
ABT-1	0.181914
F36D3.5	0.181986
E04F6.15	0.182066
PINN-4	0.182083
Y79H2A.2	0.182086
PPH-5	0.182091
T11F8.5	0.182126
ZK795.2	0.182138
F10E7.2	0.182152
VARS-1	0.182239
K12C11.1	0.182268
AQP-1	0.182287
C34B2.4	0.182321
CLEC-94	0.182377
ANMT-2	0.18239
F23B2.7	0.182449
ROL-1	0.182475
C14A6.13	0.182484
HIM-19	0.182524
Y39E4A.1	0.182595
Y18H1A.1	0.182628
C32F10.8	0.182865
Y38H6C.15	0.182873
HIS-68	0.182951
Y45G5AM.2	0.18302
PHY-3	0.183052
SNF-10	0.183054
F26B1.5	0.183055
ZC190.8	0.183201
IFC-2	0.183219
T28B8.6	0.183362
PHO-4	0.18337
Y49E10.29	0.183492
C54D10.4	0.183493
MRPL-20	0.183548
F41B4.1	0.183565
RPL-25.1	0.183584
SPE-11	0.183644
Y67D8B.5	0.183679
HRG-4	0.183758
CLEC-198	0.183759
F58D5.8	0.183768
PCP-4	0.183831
MRPL-1	0.183902
Y47G6A.19	0.183939
W01B11.1	0.18396
C40H1.7	0.184088
SRH-248	0.184102
F46F5.5	0.184252
PARP-1	0.184253
F36H2.4	0.18433
ACP-3	0.18434
W01B6.8	0.184343
F07F6.7	0.184421
C25H3.16	0.184454
WDR-46	0.184523
W08E3.4	0.184686
K12H6.2	0.184806
Y46B2A.3	0.184833
Y48G1C.13	0.184913
M04F3.3	0.184973
C33H5.16	0.185018
C26C6.6	0.18503
F57F4.4	0.185055
NPL-4.1	0.185122
C05D11.1	0.185131
PEEL-1	0.185276
DDO-3	0.18529
BEST-20	0.185334
GLRX-21	0.185341
C18E9.8	0.185354
Y54G2A.32	0.185354
MEG-4	0.185493
F41F3.1	0.185504
R10E4.7	0.185508
ROD-1	0.185534
CYN-9	0.185537
C10G11.1	0.18557
D1022.9	0.185638
C36E6.2	0.185661
T11F8.1	0.185684
C18H2.5	0.185867
JMJD-1.1	0.185888
Y71F9B.15	0.18591
F56D6.23	0.186001
Y47G6A.14	0.18609
HDL-1	0.186121
C06C6.6	0.186153
OAC-19	0.186159
COL-137	0.186197
COL-154	0.186213
K01G5.5	0.186271
W04E12.4	0.186388
LET-754	0.186453
CEH-49	0.186531
PRI-2	0.186575
Y116A8C.37	0.186662
T28F4.3	0.18668
NDFL-4	0.186751
Y94H6A.8	0.186784
Y51A2B.4	0.186788
F26F12.5	0.18682
F07E5.8	0.186864
Y69A2AR.23	0.186898
F18A12.2	0.186959
K09F6.3	0.186966
NGN-1	0.186978
K07H8.7	0.187009
T09F3.5	0.187009
F16G10.5	0.187022
GLH-1	0.187041
C01G10.1	0.187042
MOA-1	0.187096
Y65A5A.2	0.187123
C45B11.5	0.187134
CLEC-64	0.187199
F40E3.5	0.187221
TRPP-8	0.187332
NEP-5	0.187355
SRA-14	0.187359
EGG-5	0.187417
F36G9.15	0.187446
BEST-6	0.187491
Y48G1C.5	0.187532
Y102A5C.36	0.18768
F43G9.8	0.187776
VET-6	0.187815
F40F12.3	0.187827
CLEC-166	0.18787
C23G10.7	0.187956
FARS-2	0.188006
C53D6.7	0.188166
DNJ-19	0.188191
NEP-18	0.188206
C15F1.5	0.188215
CYN-1	0.188364
AAGR-1	0.188378
K08D10.14	0.18839
GST-39	0.188495
CLEC-260	0.188501
SCL-5	0.188507
C16C8.4	0.188542
FBXB-15	0.188634
SPE-12	0.188655
TOMM-7	0.18867
SRW-97	0.188694
M116.1	0.18881
T21C12.8	0.188867
FBXA-196	0.189033
C48B6.4	0.189056
GLH-4	0.189186
C55C3.6	0.18925
ENU-3.5	0.189297
H06A10.1	0.189302
F57B1.9	0.189317
T25B9.5	0.189317
MCM-6	0.189338
B0272.3	0.189407
F59A6.4	0.189456
IRLD-8	0.189469
F42G8.8	0.18954
F49F1.2	0.189564
ASP-10	0.189696
PMT-2	0.189698
H20J04.1	0.189701
CHHY-1	0.189707
M03E7.3	0.189777
BEST-11	0.189779
Y51H7C.9	0.189929
T16G12.7	0.189936
SDZ-27	0.189975
C06C6.9	0.189981
Y67D8B.3	0.190078
F22E5.1	0.19019
TTR-51	0.190211
C25A11.1	0.190216
WDR-5.3	0.190303
F35C5.12	0.190354
Y39F10C.1	0.190402
2019-03-01	0.190431
CLEC-126	0.190447
PCP-3	0.190547
F41G3.5	0.19063
SDZ-24	0.190692
T08G3.7	0.19079
COL-91	0.190887
H06I04.5	0.190933
F10D11.5	0.190957
Y49E10.4	0.190969
CLEC-170	0.190978
C25G4.2	0.190981
C01G12.9	0.191009
R08A2.2	0.191018
K09B11.5	0.19102
ZK1320.2	0.191054
SKR-4	0.191099
F55H12.5	0.191103
SNR-3	0.191237
Y54G11A.3	0.191329
C28C12.1	0.191396
C34F11.5	0.1915
F58G6.7	0.191504
ZK1193.2	0.191622
ZK622.1	0.191664
CLEC-232	0.191674
F33D11.7	0.191682
Y37E11B.5	0.191686
BATH-21	0.191701
AC3.12	0.191773
HMIT-1.2	0.191796
K08D10.18	0.191894
Y116A8C.27	0.191907
Y54F10BM.3	0.191927
F09C3.2	0.19194
C55C2.4	0.191941
R05D7.1	0.191943
F32D8.10	0.191978
R02F2.9	0.192042
ZK507.3	0.192068
TACO-1	0.192119
Y116A8A.7	0.192154
C48B4.8	0.192203
C03B8.3	0.192204
KIN-15	0.192281
C35D10.3	0.192316
C16C10.8	0.19232
K07H8.10	0.192354
Y53H1C.3	0.192447
COX-17	0.192476
C34B2.3	0.192488
ASP-3	0.192499
TAG-344	0.192514
STR-172	0.192521
GST-28	0.192592
R08E5.1	0.1926
STR-109	0.19261
ZK6.11	0.19263
F46F5.14	0.192674
F26D2.10	0.192678
T26G10.3	0.19269
ZC513.3	0.192694
CTB-1	0.192722
CPB-2	0.192766
Y18H1A.15	0.192807
C04E6.4	0.192819
Y43E12A.3	0.19284
BEST-26	0.192859
Y52D5A.2	0.192863
EXOS-8	0.192979
CPG-2	0.193026
PGL-2	0.193056
K10D2.8	0.193103
T05B11.4	0.193129
Y51A2D.8	0.193236
ZK596.2	0.193266
OIG-3	0.19327
VHA-1	0.193277
Y71G12B.10	0.193288
ZK892.4	0.193376
CLEC-175	0.193387
C05C10.2	0.193465
F55A11.1	0.193469
Y37E11AL.12	0.193512
ACER-1	0.193581
C46E10.9	0.193588
F13D12.6	0.19365
TYR-4	0.193719
TAG-124	0.193732
C55B7.10	0.193819
W04E12.5	0.193841
Y71G12B.30	0.193875
RGS-8.1	0.193876
RGS-8.2	0.193876
R05H5.4	0.193879
BATH-19	0.193903
F59A7.2	0.193978
NEP-7	0.193989
PPH-2	0.193996
Y16B4A.2	0.194008
M110.7	0.194046
INS-27	0.194099
SET-24	0.194101
T21E12.5	0.194109
R05H10.7	0.194132
COL-162	0.194194
PUF-3	0.194203
F32B5.3	0.194343
Y69A2AR.19	0.194347
C15H11.10	0.194362
T05D4.5	0.194369
NLP-4	0.194516
GLY-10	0.194612
F46F5.11	0.194725
DHHC-13	0.19481
F22B3.8	0.19484
ZIPT-2.2	0.194936
SRH-140	0.194941
BLI-2	0.194976
M117.6	0.195062
NAC-1	0.195095
C46C11.2	0.195105
NAS-17	0.195111
HOE-1	0.195254
Y50D4B.6	0.195284
SPE-10	0.195299
CLEC-134	0.195315
C36E6.8	0.195379
ACT-2	0.195405
NEP-3	0.195489
RAN-1	0.195525
NEP-19	0.195555
ABT-5	0.195559
SZY-4	0.195583
CLEC-245	0.195641
OIG-2	0.195744
DHS-20	0.195795
F09C8.1	0.195797
HAF-2	0.19588
PFD-6	0.195891
Y69A2AR.12	0.195913
CLEC-8	0.195965
K07F5.8	0.195991
R119.2	0.196144
STR-170	0.19615
F49D11.14	0.196158
UGT-30	0.196288
CLEC-70	0.196291
SRW-48	0.196641
F54H12.7	0.196724
HIS-46	0.196751
HIS-56	0.196751
C02G6.2	0.196765
Y53F4B.19	0.196821
MPZ-3	0.196877
Y59H11AR.10	0.196965
Y71G12A.4	0.19697
F36G9.3	0.197012
Y54H5A.2	0.19704
SLC-28.1	0.197085
TTLL-15	0.197095
Y62H9A.12	0.197097
CYP-34A8	0.197112
SRAB-17	0.197149
MTX-2	0.197204
F54D10.7	0.197238
CLEC-108	0.197245
FRK-1	0.197351
CYP-13B2	0.197388
C45B11.9	0.197442
CEH-92	0.197461
STR-79	0.197467
NAS-33	0.197504
CYP-33D1	0.197655
DAP-3	0.197661
R193.2	0.197724
NEP-23	0.19782
DHS-7	0.197981
T15B7.14	0.198036
F49E2.1	0.198063
F08F3.8	0.198075
SPE-19	0.198264
Y69E1A.4	0.198283
M04G7.2	0.198352
R06A10.5	0.198377
Y63D3A.7	0.19841
SCRM-5	0.198413
ACOX-1.3	0.198486
ZMP-4	0.198508
CLEC-139	0.198584
DHS-26	0.198595
CIN-4	0.198607
F59A3.8	0.19864
DUO-1	0.198645
FBXA-40	0.198728
C09D4.3	0.198739
COL-73	0.198777
BCKD-1B	0.198838
Y37E11AR.7	0.198859
BGNT-1.6	0.198866
T05C12.9	0.198971
T07D4.2	0.199006
K08D8.5	0.199091
ACBP-4	0.199125
C50F4.12	0.199188
SLC-36.2	0.199198
CYN-2	0.199225
SRW-112	0.199299
GCY-12	0.19936
PHF-32	0.199484
ACL-1	0.199512
W03D8.8	0.199593
CYP-25A1	0.199609
K05F6.12	0.199621
F56H1.3	0.199742
Y39B6A.18	0.199766
FBXA-157	0.199847
NPRL-2	0.199859
APTF-3	0.199942
MSH-6	0.19995
TTR-55	0.199956
RBX-1	0.199979
PDHA-1	0.200095
T11F8.4	0.200114
Y59A8B.21	0.200152
CLEC-106	0.200202
W04E12.7	0.200243
Y46G5A.22	0.200283
T27A1.1	0.200294
F42G4.7	0.200313
C08F1.12	0.200322
CLEC-56	0.20035
T24D5.4	0.200374
OSTA-1	0.200428
MLTN-2	0.200454
FLP-26	0.200473
Y51B9A.7	0.200562
FLP-17	0.200596
LGC-48	0.200616
ENU-3.2	0.200722
F35C11.2	0.200735
CLEC-172	0.200808
CLEC-44	0.200834
IMMT-2	0.200889
TTR-32	0.201
H12I13.1	0.201022
CCA-1	0.201053
CTS-1	0.201065
AAT-7	0.201102
PES-23	0.20116
C09E8.1	0.201308
STR-229	0.201315
TFBM-1	0.201348
ZIPT-7.1	0.20143
F37C4.8	0.20147
CLEC-263	0.201495
GCY-1	0.201502
F26C11.1	0.201535
T01G5.7	0.201553
HSP-60	0.201559
H24K24.2	0.201565
C10A4.10	0.201576
2019-10-01	0.201623
F23F12.3	0.201643
INS-24	0.201656
R11E3.1	0.201693
C10A4.4	0.201773
MATH-48	0.201812
CLEC-92	0.201865
SQV-6	0.201886
FIPR-29	0.201891
MATH-29	0.201909
DLC-4	0.201953
ZK39.10	0.202
GOT-2.1	0.202011
OSM-7	0.202023
K11G9.3	0.202034
CLEC-45	0.202104
R08E3.1	0.202157
TTR-10	0.202206
F28A10.3	0.202217
F11G11.14	0.202233
Y105E8A.27	0.202288
WAGO-10	0.20233
PGP-12	0.202333
MRP-8	0.202343
R05H10.1	0.202367
F44F1.3	0.202458
H08M01.1	0.20256
PLEP-1	0.202626
Y105C5B.15	0.202634
SET-32	0.202682
CLEC-187	0.202786
C04G2.2	0.202875
F37A4.4	0.202924
Y92H12BL.1	0.202968
F19C7.5	0.203076
ACL-13	0.203082
F41E6.1	0.203085
Y62F5A.10	0.203117
F14H12.8	0.203158
Y51A2D.18	0.203262
B0564.2	0.203374
DNJ-12	0.203379
Y82E9BR.2	0.203391
COL-40	0.203395
R06B10.2	0.203409
SMD-1	0.203417
K01C8.1	0.203428
ACOX-1.4	0.20348
CLEC-132	0.203499
F41F3.9	0.203551
SRX-92	0.203552
CLEC-246	0.203556
SRZ-105	0.20357
F59A1.13	0.203573
C02F5.3	0.203685
C14E2.4	0.203712
ZTF-7	0.203762
BTF-1	0.20377
Y59E9AL.8	0.2038
OAC-39	0.203817
W03D8.5	0.203825
F55B11.7	0.203835
NAS-21	0.20385
TTR-58	0.203871
M116.5	0.203983
C33H5.13	0.203983
TRPL-5	0.204
STR-193	0.204033
APTF-4	0.204038
CLEC-130	0.204071
SLC-17.2	0.204106
PEPM-1	0.204131
Y54E5B.2	0.20418
SRH-237	0.204214
C35A11.4	0.204217
GLCT-1	0.20424
Y57A10A.3	0.204267
CCAR-1	0.204351
SULP-7	0.204383
F17E9.3	0.204383
B0207.9	0.204582
SCRM-7	0.204616
F56F3.4	0.20466
MIB-1	0.204669
B0280.11	0.204684
SNB-5	0.204691
FARD-1	0.204756
NLP-40	0.204771
Y42H9AR.2	0.204786
OAC-27	0.204809
R155.4	0.204813
SPE-42	0.204824
HMIT-1.1	0.204922
F35F10.6	0.204928
C14A6.8	0.204967
TAG-290	0.204994
CLEC-161	0.20501
CHST-1	0.205115
ZK669.3	0.205125
R09H10.5	0.205133
ZK262.2	0.205145
C01B10.3	0.205164
F47F6.9	0.205167
SDZ-38	0.205267
ZK262.19	0.205372
TWK-6	0.205375
TIN-9.1	0.205382
FBXB-92	0.205391
K09E4.3	0.205415
MAP-2	0.205438
C16A11.2	0.205446
CLEC-104	0.205447
FBXB-11	0.205473
F29D10.1	0.205528
Y6B3B.3	0.205547
M199.134	0.205581
DDX-35	0.205608
NCX-2	0.205615
B0393.4	0.205667
SRW-66	0.205673
CLEC-109	0.205824
F47G6.3	0.205893
BEST-21	0.205918
T19H12.6	0.205922
NKAT-3	0.206008
K11D12.6	0.206017
UGT-15	0.206031
FUT-4	0.206038
SRE-9	0.20604
FBXA-190	0.206105
T21G5.1	0.206116
C55A1.15	0.20612
TSP-19	0.206142
C45B11.8	0.206197
ULP-5	0.206253
TAG-314	0.206263
T25G12.6	0.206267
R10E8.6	0.206275
T22G5.1	0.20628
Y82E9BL.2	0.206292
ZK430.7	0.206293
ZK1098.9	0.206302
TWK-37	0.206343
BATH-24	0.206359
GLCT-4	0.206486
CLEC-185	0.206514
IPLA-5	0.206563
T23B3.6	0.206569
BEST-17	0.206582
C47D12.5	0.206606
Y55F3AM.21	0.206612
ACBP-1	0.206621
ACLY-2	0.20669
K11D2.4	0.206717
RSP-5	0.206734
T15H9.4	0.206779
C05D12.2	0.206787
C47E12.12	0.20683
SRA-23	0.206917
GTL-2	0.20695
F16C3.4	0.207006
F48E3.4	0.207025
SRG-44	0.207077
UCR-2.2	0.207136
SRT-20	0.207148
F41D3.6	0.207168
SQV-1	0.207272
CTSA-2	0.207332
WRT-7	0.207364
MRPS-12	0.207424
OAT-1	0.207446
SLC-17.6	0.20746
IRLD-1	0.207461
TRY-8	0.207532
ZK1290.7	0.207564
BATH-46	0.207608
DCT-17	0.20769
RNF-1	0.207713
BATH-3	0.207732
CHIL-26	0.207741
CYP-33C11	0.207795
T08D2.4	0.207826
R09H10.7	0.207828
B0416.5	0.207838
HPO-6	0.207849
F35A5.1	0.207876
HAF-9	0.20788
C04E6.11	0.207913
MPST-1	0.207933
2019-03-02	0.207976
RBD-1	0.208016
Y82E9BL.1	0.208085
ZK418.9	0.208275
PMP-5	0.20832
CLEC-87	0.208337
C27C7.7	0.208343
STR-123	0.208386
GYG-1	0.208409
Y105E8A.21	0.20844
TTR-57	0.208468
TBA-2	0.20856
F40G9.8	0.208562
AQP-3	0.208582
T19D12.1	0.208643
ZK809.1	0.208647
BTB-10	0.208707
Y65B4BL.3	0.208715
Y67D8C.6	0.208747
C17C3.6	0.208773
C14A6.3	0.208782
SRT-67	0.208784
T27E7.4	0.208816
SRH-138	0.20882
C17B7.8	0.208826
K08E4.7	0.208854
DUT-1	0.208907
PUF-8	0.208943
NKB-3	0.208963
B0361.11	0.208997
Y67A10A.3	0.209001
C28A5.6	0.209064
D1054.8	0.209064
KLP-15	0.209081
FBXB-42	0.209144
ICD-1	0.209157
F09D12.2	0.209178
CLEC-33	0.209219
F54H5.3	0.209228
APTF-2	0.209242
F31D5.1	0.20925
C15H11.13	0.209273
F36G3.2	0.209283
F56D6.11	0.209304
T25C12.3	0.209406
MTTU-1	0.209472
OATR-1	0.209492
K09C8.2	0.209496
Y54G11A.7	0.209545
B0281.3	0.20956
Y57A10B.6	0.20958
MRPS-6	0.209581
NEP-22	0.209614
MRPS-18C	0.209616
STR-116	0.209717
SRZ-23	0.20973
Y41C4A.17	0.209745
DAF-11	0.209752
ZK666.8	0.209839
HTP-1	0.209839
H27M09.5	0.209912
NCR-2	0.209915
FBXA-184	0.209941
GLCT-2	0.209951
CLEC-53	0.209995
F22D6.9	0.210111
F01D5.3	0.210122
Y70C5A.4	0.210143
M01G5.3	0.210149
R02F11.9	0.210217
Y39E4B.5	0.210219
TTR-7	0.210231
F49E2.2	0.210248
R07E3.4	0.210287
Y37H2A.1	0.210309
SRH-194	0.210309
SRBC-23	0.210334
B0252.3	0.210339
ACOX-1.5	0.21042
F56C9.7	0.210453
AMT-1	0.210466
PAF-1	0.21048
CATP-5	0.210488
Y66H1A.4	0.210517
DGTR-1	0.210532
TWK-33	0.210595
F27D9.2	0.210624
Y57E12AL.4	0.210686
C41G7.9	0.210702
F56A4.10	0.21072
CLEC-129	0.210725
F45C12.17	0.21073
C18A11.3	0.210757
SRH-46	0.210766
FLP-4	0.210806
MATH-38	0.210817
SPE-15	0.210834
RAM-2	0.210834
IFA-4	0.210861
SRBC-76	0.210862
C06A1.2	0.210911
C09B9.85	0.210911
C10A4.6	0.210937
CLEC-26	0.210966
T19D2.1	0.211001
NST-1	0.211028
SRW-59	0.211034
CLEC-135	0.211045
SRT-19	0.211082
LGC-54	0.211121
CLEC-88	0.211127
NLP-1	0.211176
C28F5.4	0.211183
W09G12.9	0.211217
M04D5.1	0.211231
HPO-34	0.211245
T22D1.8	0.211255
INX-22	0.211266
T26E3.7	0.211282
TTR-8	0.211293
SCAV-3	0.211339
K12B6.2	0.211372
Y39B6A.29	0.211388
METL-2	0.211409
PFN-3	0.211419
BYN-1	0.211478
NSTP-6	0.211485
TWK-26	0.211501
GCST-1	0.211503
F46F2.4	0.211532
C49C8.1	0.211556
LGC-16	0.211565
F19B2.7	0.21158
NMUR-2	0.21161
ALY-3	0.21163
PFD-5	0.211645
C31H1.2	0.21165
C08B6.8	0.211671
Y45F10C.6	0.211686
ASP-6	0.211688
UGT-31	0.211721
SWAH-1	0.211724
GCY-2	0.21177
C35A5.4	0.211774
CLEC-137	0.211777
ADSS-1	0.211801
FPN-1.2	0.211803
T10D4.14	0.211804
SRW-137	0.211832
Y26G10.5	0.211849
SRX-5	0.211859
B0024.15	0.211867
SRE-5	0.211873
C05C10.7	0.211904
CYTB-5.2	0.211908
HLH-11	0.211937
Y48G8AL.13	0.211953
FBXA-192	0.211954
ACS-1	0.211973
CLEC-125	0.212013
F49F1.4	0.21202
SRH-258	0.212024
SPE-6	0.212025
CYP-14A2	0.21204
SRE-34	0.212069
SRBC-2	0.212112
ZK1236.1	0.212159
Y54G11A.1	0.212172
R08H2.10	0.212182
Y57G11C.23	0.212207
IRLD-6	0.212233
IPLA-7	0.212359
CYP-35B3	0.212366
T08G3.13	0.212372
SRI-65	0.212386
FLP-24	0.212405
SRD-2	0.212428
STR-84	0.212431
ZK945.8	0.212434
W02G9.3	0.212436
T24H10.5	0.212437
F46B3.23	0.212445
ETS-6	0.21246
SRJ-22	0.212476
RAB-33	0.212481
SQST-3	0.212651
T13B5.9	0.212658
MBOA-4	0.212671
CYP-31A5	0.212714
Y70C5B.2	0.212756
SMF-3	0.212761
Y17G9A.2	0.212791
TXDC-9	0.212813
R03G8.4	0.212871
T12C9.7	0.212892
AAT-4	0.212929
C50F2.1	0.212931
T19D12.9	0.21301
CLEC-110	0.213011
Y67D8C.3	0.213067
ADS-1	0.213156
COL-85	0.213175
T22F3.7	0.213194
SRH-295	0.213213
Y95B8A.4	0.213241
ZK354.9	0.213253
STR-16	0.213255
Y39A1A.17	0.213271
C55C2.3	0.213308
FBXA-76	0.213328
F56H6.1	0.213406
OAC-52	0.213411
Y37H2A.7	0.213414
F25H5.8	0.213445
ZC53.4	0.213474
Y43F8C.13	0.213476
K08D8.2	0.213486
C31B8.9	0.213491
Y17G7B.8	0.213542
NEP-4	0.213546
F20D1.9	0.21356
CLEC-253	0.21358
HTP-2	0.213638
STR-14	0.213642
NFT-1	0.213685
ACT-1	0.213702
SRH-234	0.21371
CYP-14A1	0.21375
F36H1.3	0.213775
C06A8.6	0.21379
F52D2.5	0.213799
F56D5.9	0.213808
K02F6.4	0.21381
GTL-1	0.213831
TTR-24	0.213837
TTR-21	0.213874
NARS-2	0.213916
C17H12.8	0.213918
Y94A7B.11	0.213966
UGT-42	0.214013
PAM-1	0.214014
NAS-32	0.214067
F27E5.3	0.214087
ABT-6	0.214203
ECH-9	0.214226
Y51A2D.13	0.214244
CHIL-14	0.214249
SRH-133	0.214351
F41D3.7	0.214363
F35C8.5	0.214411
Y9C9A.17	0.214415
GLCT-5	0.214445
Y75B8A.44	0.214466
PRDX-6	0.214489
M195.4	0.214517
SRG-55	0.21459
C34F11.1	0.214596
F56H1.10	0.214604
SRW-143	0.214631
MATH-34	0.214645
F55E10.1	0.214682
F26A1.7	0.214702
F23C8.8	0.214703
SET-8	0.214762
SQD-1	0.214787
SRBC-1	0.214873
C26G2.2	0.214883
SRG-68	0.214884
T07D10.3	0.214911
MRPL-9	0.214947
K08D10.11	0.21496
F09G2.1	0.214993
SRU-29	0.215018
ACP-4	0.215037
F10G2.1	0.21504
C08F8.6	0.215052
SRH-87	0.215108
GIP-2	0.215116
[truncated: 10,700 more rows]
